1 **Title:**

2 Thermal stress triggers productive viral infection of a key coral reef symbiont

3 **Running title:**

4 Dynamics of dinoRNA viruses in heat-stressed coral colonies

5

6 **Authors and affiliations:**

7 Carsten GB Grupstra<sup>1</sup>, Lauren I Howe-Kerr<sup>1\*</sup>, Alex J Veglia<sup>1\*</sup>, Reb L Bryant<sup>1,2</sup>, Samantha R  
8 Coy<sup>1</sup>, Patricia L Blackwelder<sup>3</sup>, Adrienne MS Correa<sup>1</sup>

9 <sup>1</sup>BioSciences at Rice, Rice University, Houston, TX, USA.

10 <sup>2</sup>Department of Ecology and Evolutionary Biology, The University of Kansas, Lawrence, KS,  
11 USA.

12 <sup>3</sup>University of Miami Center for Advanced Microscopy (UMCAM), Department of Chemistry,  
13 1301 Memorial Dr, Coral Gables, FL 33146-0630, USA

14 \*These authors contributed equally to this work.

15

16 **Competing Interests statement:**

17 The authors declare that they have no competing interests.

18

19 **Abstract**

20 Climate change-driven ocean warming is increasing the frequency and severity of bleaching  
21 events, in which corals appear whitened after losing their dinoflagellate endosymbionts (family  
22 Symbiodiniaceae). Viral infections of Symbiodiniaceae may contribute to some bleaching signs,  
23 but little empirical evidence exists to support this hypothesis. We present the first temporal  
24 analysis of a viral lineage—the Symbiodiniaceae-infecting ‘dinoRNAVs’—in coral colonies  
25 exposed to a 5-day heat treatment. Throughout the experiment, all colonies were dominated by  
26 Symbiodiniaceae in the genus *Cladocopium*, but 124 dinoRNAV major capsid protein  
27 ‘aminotypes’ (unique amino acid sequences) were detected across coral genets and treatments.  
28 Seventeen dinoRNAV aminotypes were found only in heat-treated fragments, and 22 aminotypes  
29 were detected at higher relative abundances in heat-treated fragments. DinoRNAVs also  
30 exhibited higher alpha diversity and dispersion under heat stress. Together, these findings  
31 provide the first empirical evidence that exposure to high temperatures triggers some  
32 dinoRNAVs to switch from a persistent to a productive infection mode within heat-stressed  
33 corals. Over extended time frames, we hypothesize that cumulative dinoRNAV lysis of  
34 Symbiodiniaceae cells during productive infections could decrease Symbiodiniaceae densities  
35 within corals, observable as bleaching signs. This study sets the stage for reef-scale  
36 investigations of dinoRNAV dynamics during bleaching events.

37

## 38 **Introduction**

39 Warming seas, driven by climate change, are increasingly causing bleaching events: mass losses  
40 of endosymbiotic dinoflagellates (family Symbiodiniaceae) from corals and other invertebrate  
41 hosts. Bleaching events often result in coral mortality and are contributing to the degradation of  
42 reef ecosystems globally (1,2). Viruses, which are diverse and abundant on coral colonies (3–7),  
43 are hypothesized to contribute to some coral bleaching signs by lysing Symbiodiniaceae cells  
44 (e.g. 8–10). Alternatively, viral shifts in conjunction with bleaching-associated stressors (11,e.g.  
45 12–14) could merely be correlated with bleaching signs or constitute opportunistic secondary  
46 infections (15,16). Beyond bleaching, viruses may influence colony health by altering the  
47 function of resident microbial symbionts or coral tissues (e.g. 17–23). Although various roles for  
48 viruses in coral bleaching, disease and function have been hypothesized, thus far, these roles  
49 have been difficult to test empirically.

50 Symbiodiniaceae are putative target hosts of DNA and RNA viruses (reviewed in 6,7),  
51 including the ‘dinoRNAVs’, a group of dinoflagellate-infecting positive-sense single stranded  
52 RNA viruses. Although dinoRNAVs have yet to be isolated, stably propagated, and fully  
53 characterized, they have been detected from Symbiodiniaceae cultures, as well as Atlantic and  
54 Pacific corals spanning 6 genera (Table 1). These associations suggest that dinoRNAVs are  
55 prevalent as persistent infections in Symbiodiniaceae cells (8–10,24,25). Furthermore, increased  
56 dinoRNAV detection (24) and enhanced host anti-viral response (26) suggest that under stressful  
57 conditions, dinoRNAVs may switch to a more productive replication mode in which they  
58 directly lyse their hosts. This infection strategy has recently been identified in other algal host-  
59 virus systems (e.g., coccolithophore *Emiliana huxleyi*-EhV system, 27).

60 Heterocapsa circularisquama RNA virus (HcRNAV), which infects free-living  
61 dinoflagellates, is among the closest known relatives to Symbiodiniaceae-infecting dinoRNAVs  
62 (24,28). HcRNAV undergoes a strictly lytic replication cycle following a latent period of 24-48  
63 hours, during which the host is infected but not lysed and viruses have not been released (29).  
64 We therefore posited that shifts by Symbiodiniaceae-infecting viruses into a more productive  
65 replication mode might also be detectable within the first few days of exposure to stress  
66 (13,24,26). Examining viral dynamics within individual colonies at the onset of thermal stress  
67 should clarify the relationship between viral infection of Symbiodiniaceae and coral bleaching  
68 signs.

69 To investigate the role of Symbiodiniaceae-infecting viruses in coral bleaching, we  
70 quantified, for the first time, the temporal dynamics of dinoRNAVs within individual coral  
71 colonies. To accomplish this, colonies of the stony coral *Pocillopora* species complex were  
72 exposed to acute (+~2°C) thermal stress, and dinoRNAV diversity was quantified over a 5-day  
73 period. We hypothesized that: (1) dinoRNAVs are common in coral colonies; (2) dinoRNAV  
74 richness increases and compositions shift under thermal stress; and (3) changes to dinoRNAVs  
75 occur within 72 hours. By analyzing dinoRNAV diversity at the amino acid level, this study  
76 partially circumvented methodological challenges arising from the high mutation rates and  
77 genetic diversity of single-stranded RNA viruses (30–32), which have previously made it  
78 difficult to compare RNA viral dynamics across ecologically relevant scales (33). As dinoRNAV  
79 work on reefs continues to progress, the aminotypes presented here may eventually merit further  
80 collapse into ‘quasispecies’—heterogeneous mixtures of related genomes (33–36)—a common  
81 approach for conceptualizing diversity within RNA virus populations.

## 82 **Materials and methods**

## 83 **Experimental design**

84 We conducted a replicated aquarium experiment (two treatments; four aquariums per treatment)  
85 in which fragments from five colonies of *Pocillopora* species complex (37) were exposed to  
86 control conditions (ambient reef water; 28.2°C) or a +2.1°C heat treatment (summer bleaching  
87 temperatures; 30.3°C) for 5 days (See Figure S1 and Supplementary Methods, 38,39). At the start  
88 of the experiment ( $t_{(h)} = 0$ ), all fragments were photographed with a Coral-Watch Health  
89 Monitoring Chart (40) in the frame, and one fragment per colony in the control aquaria was  
90 preserved as an initial control. At five time points ( $t_{(h)} = 4, 12, 24, 72$  and 108 h), all fragments  
91 were photographed again and visually inspected for signs of stress (e.g., excessive mucus  
92 production), lesions and/or paling. A control and a heat-stressed fragment per colony were also  
93 preserved at each time point (generating 10 fragments per time point). DNA and RNA were  
94 extracted from each sample (which included coral animal tissue, Symbiodiniaceae cells and  
95 viruses) using a ZymoBIOMICS DNA/RNA Miniprep Kit (Zymo Research, Irvine, CA, USA)  
96 with an additional enzyme digestion step to improve viral RNA yields; cDNA was then  
97 synthesized from eluted RNA (see Supplementary Methods). At the 24 and 72 h timepoints,  
98 samples were also fixed for transmission electron microscopy (TEM) imaging in 3X PBS with  
99 2% paraformaldehyde (see Supplementary Methods).

100 To characterize the effect of the heat treatment on Symbiodiniaceae cell densities (a  
101 metric of coral health and bleaching status), we compared brightness values from standardized  
102 photographs of each coral fragment—a proxy for Symbiodiniaceae chlorophyll concentrations—  
103 at the start of the experiment and at the time of preservation (see Supplementary Methods,  
104 40,41). Symbiont diversity was characterized by sequencing the internal transcribed spacer-2  
105 (ITS-2) region of Symbiodiniaceae rDNA from fragments of each coral colony using primers

106 from Hume et al (42) following methods in Howe-Kerr et al (43; see Supplementary Methods).  
107 Sequences were processed using Symportal (44).

### 108 **Sequencing of dinoRNAV major capsid protein gene amplicons, bioinformatics** 109 **processing, and phylogenetic analysis**

110 The dinoRNAV major capsid protein (*mcp*) gene was amplified from cDNA libraries using a  
111 nested PCR protocol with degenerate primers (28); cleaned and normalized libraries were  
112 sequenced on the Illumina MiSeq platform using PE300 v3 chemistry. Processing and analysis of  
113 dinoRNAV *mcp* gene reads was conducted using the program vAMPIRUS (See Supplementary  
114 Methods for sequencing and read processing details; Veglia *et al.*, 2021). Briefly, ASVs were  
115 generated using the UNOISE (46) algorithm with vsearch (47), and all ASVs were then  
116 translated and collapsed into unique amino acid sequences, ‘aminotypes’. Any sequences  
117 containing stop codons were removed prior to further analysis.

118 An alignment was made in MUSCLE using aminotypes from this study, a dataset from  
119 the Great Barrier Reef (28) that was reprocessed using the methods above, and a set of reference  
120 best BLASTx hits to the NCBI database (48). The alignment (Supplementary Data 1) was  
121 trimmed to the first column on either side which contained no gaps, and then used to determine  
122 the best model for evolution (LG+G4+I) according to ModelTest-NG (49). A maximum-  
123 likelihood phylogeny was inferred with RAxML-NG (1000 bootstrap iterations) and rooted with  
124 HcRNAV as an outgroup.

### 125 **DinoRNAV diversity metrics based on *mcp* aminotypes**

126 All data processing, visualization, analysis and statistical tests were conducted in R version 4.0.2  
127 and Vegan 2.5-6 (50) on an aminotype counts table (Supplementary Data 2). For some analyses,  
128 the dataset was rarefied to 59 837 amino acid sequences. Shannon’s diversity index (H) values

129 were calculated based on rarefied data; expected aminotype richness values were calculated  
130 using repeated random subsampling of non-rarefied data (sample size=59 837 amino acid  
131 sequences). Venn diagrams were made from non-rarefied data using the online tool  
132 <http://bioinformatics.psb.ugent.be/webtools/Venn/> (accessed August 17<sup>th</sup>, 2020). For  
133 comparison, Venn diagrams were also made based on rarefied data (results not shown); these  
134 Venn diagrams exhibited similar patterns but were less conservative and were therefore not  
135 included.

136 To quantify the dispersion of dinoRNAVs between treatments and over time, a non-  
137 metric multidimensional scaling (NMDS) plot was constructed based on Bray-Curtis distances  
138 from square-root-transformed rarefied data (k=2, 999 iterations), and the distance to centroid for  
139 each sample was calculated. Since dinoRNAVs differed among coral colonies, we calculated  
140 centroids for each individual colony in the control and heat treatments separately (5 colonies x 2  
141 treatments = 10 centroids) in order to examine the effect of heat treatment on dinoRNAV  
142 dispersion in a given coral colony. For this analysis, different timepoints were used as replicates.

### 143 **Statistical analyses**

144 We tested for differences in brightness values from the coral fragment colorimetric  
145 analysis, as well as differences in dinoRNAV aminotype alpha diversity (Shannon's index and  
146 aminotype richness) and dispersion (distance to centroid) using linear mixed effects models  
147 (LMM) with the package LME4 v1.1-23 (40,51). We tested for an interaction between treatment  
148 and timepoint; by incorporating colony ID as a random effect, this analysis approaches a  
149 repeated measures test. F-tests were used for model selection with car v3.0-8. Assumptions of  
150 normality of the residuals were assessed visually with quantile-quantile plots and Shapiro-Wilk  
151 tests; the assumption of homogeneity of variance was visually assessed using plots with residuals

152 versus fitted values. Dispersion values did not follow the assumption of normality of the  
153 residuals and were square root-transformed. We also tested for differences between control and  
154 heat-treated fragments at each timepoint (using colonies as replicates), as well as per colony  
155 (using time points as replicates), on dinoRNAV aminotype diversity and dispersion with  
156 ANOVAs and controlled for type 1-errors using a Bonferroni correction.

157         The effect of heat treatment on the overall composition of dinoRNAVs was tested with a  
158 PERMANOVA using `adonis()` in `vegan` based on Bray-Curtis distances from square-root-  
159 transformed rarefied data. We tested for an interaction between treatment and colony and added  
160 time as an additional factor. Although dispersion differed significantly among groups (betadisper  
161 test), PERMANOVA is robust to heterogeneous dispersion if the design is balanced (52).

162         Lastly, we conducted a differential abundance analysis using the non-rarefied amino acid  
163 counts table with DESeq2 v1.26.0 (53). We fitted a negative binomial model and Benjamini-  
164 Hochberg FDR-corrected Wald tests ( $\alpha=0.05$ ) were used to test for differences in taxon  
165 abundance between treatment within each colony and at each timepoint after the start of the  
166 experiment ( $t_{(h)}= 4, 12, 24, 72, 108$ ). We excluded all fragments sampled at timepoint 0 and any  
167 fragments with <10 000 reads, as well as the fragment from the other treatment corresponding to  
168 the fragment with insufficient reads at the same time (colonies 3 and 5 at timepoint  $t_{(h)}=4$ , colony  
169 3 at  $t_{(h)}=72$ ).

## 170 **Results**

### 171 **Coral holobiont traits**

172 Coral fragments in the control and heat aquariums remained apparently healthy throughout the  
173 experiment; no signs of stress such as paling, mucus production, or tissue sloughing were  
174 observed. Linear mixed effects models of color values did not reveal significant paling in heat-



175 treated coral fragments (treatment  $F=0.10$ ,  $p=0.75$ ; timepoint  $F=0.30$ ,  $p=0.59$ ;  
176 treatment\*timepoint  $F=0.09$ ,  $p=0.77$ ). Lack of color change was expected; bleaching signs are  
177 generally only detectable after weeks of ecologically relevant temperature stress—even though  
178 vital molecular processes are affected after several days (54). All colonies contained what we  
179 interpret as a species of Symbiodiniaceae closely related to *Cladocopium goreaui* (44,55);  
180 Symbiodiniaceae diversity did not change over time (Figure S2).

### 181 **Transmission electron microscopy imaging of Symbiodiniaceae and associated** 182 **virus-like particles**

183 Symbiodiniaceae cells in coral fragments exposed to 24 hours of heat treatment showed a pattern  
184 of vacuolization in the chloroplasts (Figure 1a) compared to cells in control fragments (Figure  
185 1g). Many vacuoles in Symbiodiniaceae cells contained one to several VLPs with icosahedral,  
186 electron-dense capsids that were 110-170 nm in size and lacking envelopes (Figure 1a-d).  
187 Similar VLPs were observed immediately outside Symbiodiniaceae cells; some also appeared to  
188 be endocytosed by—or exiting out of—Symbiodiniaceae cells (Figure 1e-h).

### 189 **DinoRNAV major capsid protein (*mcp*) gene sequencing overview**

190 Amplicon sequencing of the dinoRNAV major capsid protein (*mcp*) gene resulted in 10 222 055  
191 paired raw reads from all samples and one negative control. A total of 7 593 537 reads with a  
192 mean length of 423 bases (before trimming to 422 bases) remained after merging and quality  
193 control. Denoising resulted in 273 unique amplicon sequence variants (ASVs) across all samples,  
194 and translation revealed that 11 ASVs contained stop codons; these ASVs were removed.  
195 Translated ASVs collapsed into 124 ‘aminotypes’ (unique amino acid sequences) at a length of  
196 140 amino acids.

197           DinoRNAV *mcp* genes were detected in fragments from all 5 coral colonies, but 5 control  
198 samples and the negative control were not retained for further analysis because they contained  
199 few (<10 000) amino acid sequences (the negative control had 20 amino acid sequences). All  
200 remaining samples had between 50 000 and 210 000 amino acid sequences with a mean read  
201 depth of  $142\,810 \pm 36\,163$  (SD).

202   **DinoRNA viruses in *Pocillopora* species complex colonies are closely related to**  
203 **dinoRNAVs in other coral species**

204   The 124 unique dinoRNAV aminotypes (Figure 2; Table S1) identified in this study were most  
205 similar to 13 amino acid sequences from a previously published dinoRNAV library (28);  
206 sequence similarities to aminotypes from published dinoRNAVs ranged from 52.1-99.3% (e-  
207 values ranged between  $9.6 \cdot 10^{-73}$ - $2.7 \cdot 10^{-35}$ , Table S1). All dinoRNAV *mcp* aminotypes in this  
208 study form a clade that is more recently derived than reference sequences such as HcRNAV,  
209 Beihai sobemo-like virus and sponge weivirus-like virus (Figure 2). The dinoRNAV aminotypes  
210 in this study may form (at least) three quasispecies (e.g. red rectangles in Figure S3, sensu 56).  
211 Strikingly, the majority of dinoRNAV *mcp* genes identified in our study occupy one clade; on  
212 average, sequences in this clade vary  $9.8\% \pm 5.5$  (SD) from each other (Figure 2; Figure S3).  
213 Ultra-deep sequencing may be necessary to further clarify the drivers of these potential ‘mutant  
214 cloud dynamics’ in Symbiodiniaceae hosts (57). In several branches of the tree, aminotypes from  
215 our study are most closely related to aminotypes detected from Symbiodiniaceae in *Acropora*  
216 *tenuis*, *Favia fungites*, *Galaxea fascicularis*, *Pocillopora damicornis*, *Porites cylindrica*, and  
217 *Porites lutea* corals sampled from the Great Barrier Reef (28). Dominant aminotypes (>1%  
218 abundance across total dataset) are present in all major branches of the tree but differ by as much

219 as ~40% in amino acid sequence (Supplementary Figure 3). Aminotypes detections varied across  
220 treatment and time in the experiment (shading of red and black squares in Figure 2).

### 221 **DinoRNAV aminotypes differed among coral colonies and treatments**

222 Approximately 34% (42 of 124 aminotypes) of aminotypes in this study were present in all  
223 colonies, 48% (60) were shared between 2-4 colonies and 18% (22) were unique to individual  
224 coral colonies (with individual colonies having up to 6 unique colony-specific aminotypes,  
225 Figure 3a). All 14 aminotypes that each comprised >1% reads in the total dataset (listed in Figure  
226 3b) were detected in all five coral colonies. DinoRNAV aminotypes varied among individual  
227 colonies (Figure 3b); colony ID was the most powerful predictor of viral composition  
228 (PERMANOVA:  $R^2 = 0.76$ ,  $p < 0.001$ ). DinoRNAVs responded to elevated temperatures in  
229 colony-specific ways, as indicated by a significant interaction effect between treatment and  
230 colony (PERMANOVA:  $R^2 = 0.068$ ,  $p < 0.001$ ). Treatment was also significant by itself  
231 (PERMANOVA:  $R^2 = 0.02$ ,  $p < 0.001$ ), demonstrating a subtle but consistent response to elevated  
232 temperatures across all colonies. Time was not a significant predictor (PERMANOVA:  $R^2 = 0.01$ ,  
233  $p = 0.77$ ; Figure 3b).

### 234 **Heat treatment rapidly increased the diversity of dinoRNAV aminotypes**

235 A total of 17 aminotypes were unique to the heat treatment; 1 aminotype was unique to the  
236 controls (Figure 4a; Table 2). Heat-specific aminotypes were observed in all colonies and ranged  
237 from 1-6 unique aminotypes per colony. Three heat-specific aminotypes were shared among  
238 multiple (2-3) coral colonies; the remaining 14 heat-specific aminotypes were not shared  
239 between colonies. These findings demonstrate that heat-specific aminotypes were not restricted  
240 to individual fragments but were shared between fragments of the same colony or among

241 colonies. However, most heat-specific aminotypes were relatively rare, with only two  
242 aminotypes comprising >1% of reads in each fragment (aminotypes 25 with 1.8%; aminotype  
243 114 with 1.4%; other aminotypes with means of 0.01-0.7% of reads in individual fragments).  
244 The single aminotype that was unique to control fragments was identified in one fragment after  
245 72 hours (0.02% of reads in that fragment).

246         Alpha diversity (Shannon's index, H) of aminotypes was positively associated with the  
247 heat treatment ( $F=4.92$ ,  $p=0.03$ ) and time ( $F=4.86$ ,  $p=0.03$ ) in our linear mixed effects model  
248 (LMM; Figure 4b, d, h). There was no significant interaction between heat and time ( $F=0.54$ ,  
249  $p=0.47$ ). On average ( $\pm$  SE), Shannon's index was 27% higher in heat-treated fragments ( $1.1 \pm$   
250  $0.6$ ) than controls ( $0.8 \pm 0.6$ ; Figure 4b). Within individual timepoints, heated fragments had 4-  
251 93% higher mean H values ( $0.9-1.3$ ) than controls ( $0.7-1.0$ ; Figure 4d), but individual  
252 comparisons were not significant. Means of Shannon's index per colony ranged between 0.1-1.6  
253 for control fragments and 0.5-1.8 for heat-treated fragments (Figure 4f).

254         There was a significant positive association between viral aminotype richness and heat  
255 treatment ( $F=5.71$ ,  $p=0.02$ ), but not aminotype richness and time ( $F=0.36$ ,  $p=0.55$ ) in our LMM  
256 (Figure 4c, e, i). There was no significant interaction between treatment and time ( $F=0.10$ ,  
257  $p=0.75$ ). On average, aminotype richness was 16% higher in heat-treated ( $37.2 \pm 2.0$ ) than  
258 control fragments ( $32.0 \pm 2.1$ ; Figure 4c). At individual timepoints, heat-treated fragments had 7-  
259 23% higher mean aminotype richness ( $34.8-39.1$ ) than controls ( $29.2-35.4$ ; Figure 4e), but these  
260 differences were not significant. Mean aminotype richness for individual colonies (using  
261 timepoints as replicates) ranged between 19.5-44.6 for control fragments and 28.0-44.9 for heat-  
262 treated fragments (Figure 4g).

263 **Twenty-two aminotypes had higher relative abundances in heat-treated**  
264 **fragments**

265 DESeq2 analysis revealed 28 aminotypes had significantly altered relative abundances in heat-  
266 treated or control fragments (Figure 5). Twenty-two aminotypes had higher relative abundances  
267 in heated fragments, whereas 6 aminotypes had higher relative abundances in controls. Ten  
268 aminotypes were differentially abundant at multiple (2-4 out of 5) timepoints throughout the  
269 experiment. Aminotypes 29, 38 and 98 were significantly more abundant in the heat treatment in  
270 4 out of 5 sampled timepoints (from 12 to 108 h); Aminotype 93 was more abundant in the final  
271 3 timepoints (from 24 to 108 h).

272 **Dispersion of dinoRNA V *mcp* amino acid sequences increased in heat-treated**  
273 **fragments**

274 Dispersion (measured as distance to centroid) of dinoRNAVs was positively associated with heat  
275 treatment (Figure 6a, b, e;  $F=11.00$ ,  $p=0.002$ ) in our LMM. There was no effect of time ( $F=1.07$ ,  
276  $p=0.31$ ) and no interaction between treatment and time ( $F=0.64$ ,  $p=0.43$ ). Overall, mean ( $\pm$ SE)  
277 dispersion was 62% higher in the heat treatment when all colonies and timepoints were pooled  
278 (control:  $0.14 \pm 0.09$ ; heat:  $0.23 \pm 0.13$ ). A trend of increasing dispersion (32-100% higher) of  
279 dinoRNAVs was observed in heat-treated samples at individual timepoints (Figure 6c; controls:  
280  $0.12$ - $0.17$ ; heat:  $0.2$ - $0.29$ ), but individual comparisons were not significant. Mean dispersion of  
281 individual colonies (across timepoints) ranged between  $0.1$ - $0.24$  for controls and  $0.13$ - $0.37$  for  
282 heat-treated fragments, resulting in an increase of 11-93% per colony, but individual  
283 comparisons were not significant (Figure 6d).

284 **Discussion**

285 Viruses can have diverse impacts on hosts, ranging from antagonistic to beneficial (58–61).  
286 Efforts to understand how viral infections impact coral colonies have been stymied by the lack of  
287 (1) a high-throughput approach to track a viral lineage in colonies across an acute stress event;  
288 and (2) established cultures of viruses associated with corals (for use in viral addition  
289 experiments). This study tracks a group of Symbiodiniaceae-infecting viruses, the dinoRNAVs,  
290 in a controlled experiment to interrogate how infection responds to temperatures associated with  
291 bleaching. DinoRNAVs were detected from all five coral colonies examined, and from every  
292 heat-treated coral fragment, but only some controls. These observations, as well as detections of  
293 higher alpha diversity of *mcp* aminotypes, increased dinoRNAV dispersion, the identification of  
294 unique *mcp* aminotypes, and greater relative abundances of specific aminotypes in heat-treated  
295 fragments, together strongly indicate that dinoRNAV infections were more active in heat-treated  
296 fragments. DinoRNAV responses were detectable within a single day, more quickly than the  
297 several weeks over which bleaching signs typically manifest. If viral infection of  
298 Symbiodiniaceae cells is enhanced (e.g., increased production, accumulation of viral diversity)  
299 during thermal anomalies *in situ*, then this cumulative viral activity (if maintained over weeks)  
300 could contribute to bleaching onset on reefs, or otherwise disrupt of coral-Symbiodiniaceae  
301 partnerships.

### 302 **DinoRNAVs as a common, persistent virus of Symbiodiniaceae**

303 DinoRNAV *mcp* genes were detected in all colonies (N=5), and in most to all fragments per  
304 colony (73-100% of fragments, N=8/11 – 11/11 fragments per colony). DinoRNAV genes have  
305 additionally been reported from colonies of seven other stony coral species across the Atlantic  
306 and Pacific Oceans (Table 1, Figure 2), suggesting that these viruses are commonly associated  
307 with coral microbiota. In this experiment, viral aminotype compositions (and potential viral

308 quasispecies) differed among coral colonies, but were similar within the fragments of a given  
309 colony, despite maintenance in separate aquaria (Figure 3). These results suggest that, under  
310 ambient conditions, dinoRNAV populations are driven strongly by within-colony factors and are  
311 relatively homogeneously distributed throughout entire coral colonies. RNA viruses rely on  
312 RNA-dependent RNA polymerase (RdRp) for replication, which is relatively error-prone.  
313 Therefore, individual viral progenitors infecting Symbiodiniaceae cells in a given colony may  
314 each produce a variety of genetically distinct viral “progeny” during a single replication cycle  
315 (34,62); hence, the observed pattern of colony-specificity in dinoRNAV aminotypes likely  
316 results from diversification within ‘quasispecies’ and (potentially) subsequent purifying selection  
317 (33,63–65). This production of a ‘mutant cloud’ of dinoRNAV diversity may even help ensure  
318 these viruses are successful (at the population level) at infecting Symbiodiniaceae under  
319 changing environmental conditions (35).

320         Healthy corals contain millions of Symbiodiniaceae cells per cm<sup>2</sup> of coral tissue; our  
321 results suggest that Symbiodiniaceae cells *in hospite* may be infected by one or perhaps several  
322 dinoRNAV quasispecies at any given time (e.g., Symbiodiniaceae in colonies 2 and 3, Figures 2  
323 and 3). Recent surveys of free-living marine microbial communities reported that viral infections  
324 may occur in ~33% (66,67) to over 60% (68) of marine microorganisms, and many individual  
325 cells may be infected by several viruses at a given time (66,69). Considering that our sequencing  
326 data are based on *mcp* gene amplicons from RNA libraries generated from unfractionated coral  
327 tissue, dinoRNAV *mcp* gene detections could potentially arise from several sources, including  
328 RNA genomes within intact dinoRNAV capsids (28), *mcp* genes that are being expressed in host  
329 cells during the dinoRNAV replication cycle, free dinoRNAV genomes that may occur as  
330 extrachromosomal RNA in a latent (25) or carrier state similar to pseudolysogeny (70,71), and/or

331 expressed endogenized viral elements in host genomes (72,73). The amplicon sequencing  
332 approach employed here limits our ability to discern amongst these potential sources of viral *mcp*  
333 gene detections, as does the dearth of information available on dinoRNAV replication cycles.  
334 Approaches such as single cell RNA-seq (e.g. 74) of Symbiodiniaceae cells, as well as  
335 sequencing methods designed to identify and characterize infective viruses (similar to viral  
336 tagging, 75, adsorption sequencing, 76) represent critical next steps in assessing the prevalence of  
337 dinoRNAV infections within individual Symbiodiniaceae cells, and the provenance of  
338 dinoRNAV *mcp* gene detections (e.g. RNA genomes from intact viruses vs *mcp* genes expressed  
339 during the replication cycle), respectively.

#### 340 **Switching from persistent to more productive infection under stress**

341 Marine viruses have diverse infection strategies; many viruses switch between strategies upon  
342 environmental changes (58,77–81). Some marine viruses, for example, may switch between  
343 latent and productive cycles upon a variety of host-related or environmental triggers (8,82,83).  
344 RNA virus infections can range from exclusively lytic (29,84,85), to infections that are  
345 ‘persistent’ or ‘chronic’ and do not immediately kill the host (86,87). Persistent RNA viruses of  
346 plants, for example, may show altered activity based on seasonality (88), temperature (89,90), or  
347 other environmental factors (90). For persistent viruses of Symbiodiniaceae, a variety of  
348 mechanisms may modulate viral infection strategies; the role of temperature in triggering  
349 persistent infections to become more productive has received particular attention due to the link  
350 between high temperature and coral bleaching (8,24,26,83,91).

351 We identified 22 aminotypes that were present at higher relative abundances in heat-  
352 treated coral fragments (Figure 5), and 17 aminotypes were unique to these fragments (Figure 4a,  
353 c). We hypothesize that these findings indicate a switch from persistent to more productive



354 infections by some dinoRNAV strains (or quasispecies). In this study, aminotypes 29, 38, 93 and  
355 98 are particular candidates for this hypothesis, given their sustained relative increase in  
356 abundance in heat-treated corals starting at 12-24 hours (Figure 5). We encourage future studies  
357 to screen corals and Symbiodiniaceae communities (and existing sequencing libraries) for these  
358 aminotypes.

359         The observation of a rapid increase in dinoRNAV aminotypes diversity during the onset  
360 of thermal stress is consistent with a previous report of increased (but overall low) abundance of  
361 dinoRNAV transcripts in the Caribbean coral *Montastrea cavernosa* following exposure to  
362 elevated temperatures for 12 hours (24). Further, a thermosensitive culture of Symbiodiniaceae  
363 C1 had high expression of dinoRNAVs under ambient temperatures, suggesting that dinoRNAV  
364 may modulate resistance to bleaching in some species or populations of Symbiodiniaceae (26).  
365 Similarly, viral metagenomes from bleached pocilloporid colonies *in situ* contained significantly  
366 more eukaryotic virus sequences than unbleached, apparently healthy colonies (12). Experiments  
367 with the cricket paralysis virus—a +ssRNAV with similar genome architecture to dinoRNAVs in  
368 Symbiodiniaceae cultures—also showed increased viral replication after two hours when  
369 temperatures were raised by 5 °C (92). Taken together, our findings and those from other studies  
370 indicate that dinoRNAVs may play key roles in altering the thermal sensitivity of  
371 Symbiodiniaceae, and perhaps, coral colonies.

## 372 **Virus-like particles associated with heat-stressed Symbiodiniaceae cells**

373 After 24 hours of heat treatment, virus-like particles (VLPs) 110-170 nm in diameter were  
374 observed in vacuoles within Symbiodiniaceae cells (Figure 1). These VLPs were similar in size  
375 members of the *Phycodnaviridae*, such as *Chloroviruses*, *Coccolithoviruses*, and *Prasinoviruses*,  
376 within the nucleocytoplasmic large DNA viruses (NCLDVs). These viral groups have been

377 previously reported from cultured Symbiodiniaceae cells via metagenomic approaches (26) and  
378 from Symbiodiniaceae *in hospite* through a combination of metagenomic analysis and TEM  
379 imaging (12,13). We observed VLPs that may have been entering or exiting Symbiodiniaceae  
380 cells (Figure 1), suggesting active infections were occurring. Such observations—concurrent  
381 with genetic shifts in dinoRNAVs—corroborate that diverse viral groups likely respond to  
382 increased temperatures (8,10,91,93,94).

383 RNA viruses known to infect free-living dinoflagellates, such as HcRNAV, have  
384 icosahedral capsids ~30 nm in diameter (29). Similarly sized VLPs were not observed in this  
385 study, but the capsid morphology of Symbiodiniaceae-infecting dinoRNAVs remains  
386 unconfirmed. Isolation of Symbiodiniaceae-infecting dinoRNAVs and characterization of their  
387 replication cycle will further clarify which VLPs in Symbiodiniaceae TEM images are potential  
388 dinoRNAVs.

### 389 **Colony-specific dinoRNAV responses to elevated temperatures**

390 Since higher temperatures increase host cell enzymatic activity, increased viral production and  
391 accumulation of mutations within quasispecies exposed to heat stress might be expected based  
392 on thermodynamics alone (95). However, dinoRNAV responses to elevated water temperatures  
393 differed among individual coral colonies (Figures 3b, 6a), even in two colonies (3 and 4) that  
394 were both dominated by aminotype 1 in control aquaria. While dinoRNAVs in heat-treated  
395 fragments from colonies 1 and 3 exhibited strong shifts in putative quasispecies compositions,  
396 such changes were less pronounced in the other colonies. These findings suggest colonies 1 and  
397 3 and/or their dinoRNAV quasispecies were more sensitive to heat stress. Coral colonies  
398 generally exhibit heterogeneous resistance to coral bleaching (e.g. 96,97), and bleaching  
399 susceptibility in *Pocillopora* species complex has been correlated to differential communities of

400 eukaryotic viruses (12). Taken together, we hypothesize that colonies 1 and 3 in our study were  
401 more sensitive to temperature stress and likely would have shown signs of bleaching had the  
402 experiment run longer. Subsequent experiments that extend multiple weeks to sample both the  
403 onset of thermal stress and the onset of bleaching signs are a critical next step in understanding  
404 how dinoRNAV dynamics relate to colony health trajectories and relative bleaching resistance.

## 405 **Conclusions**

406 This is the first study to characterize the dynamics of Symbiodiniaceae-infecting dinoRNAVs in  
407 coral colonies exposed to ecologically relevant bleaching temperatures. We identified  
408 dinoRNAVs in each sampled coral; temperature stress elicited rapid changes to potential  
409 dinoRNAV quasispecies in terms of diversity and composition, and a subset of viral aminotypes  
410 were significantly associated with heat-treated corals. Together, these multiple lines of evidence  
411 suggest that dinoRNAVs are common as persistent infections of Symbiodiniaceae.  
412 Environmental stress may increase the productivity of these viruses, contributing to bleaching  
413 signs or other impacts on coral-Symbiodiniaceae partnerships (if stress is prolonged). Overall,  
414 these findings add to the growing body of literature demonstrating that viruses of  
415 microorganisms affect emergent phenotypes of animal and plant holobionts, and may modulate  
416 holobiont responses to changing environmental conditions.

## 417 **Acknowledgements**

418 The authors extend their sincere appreciation to Drs. Rebecca L. Vega Thurber, Andrew R.  
419 Thurber, and Craig E. Nelson for input on, and help with setting up, the experiment. Many  
420 thanks to Rebecca L. Maher and J. Grace Klinges for help with sampling, and to Dennis Conetta  
421 for assistance with DNA and RNA extractions. We additionally thank Mark Dasenko at Oregon

422 State University's Center for Genome Research & Biocomputing (Corvallis, OR) for his support  
423 in designing the sequencing methods. Financial support was provided by a Sigma-Xi Grant-in-  
424 aid of Research to C.G., a U.S. National Science Foundation award (OCE #1635798) to  
425 A.M.S.C. and an Early-Career Research Fellowship (#2000009651) from the Gulf Research  
426 Program of the National Academies of Sciences to A.M.S.C.

## 427 **Author contributions**

428 C.G., L.H.K. and A.C. conceived of the experiment; C.G., L.H.K., and A.J.V. developed the  
429 methods with support from A.C.; C.G., L.I.H., R.B., and A.C. conducted the experiments and  
430 processed samples; C.G. led data analysis, with contributions by all authors; C.G. wrote the first  
431 draft of the manuscript, with contributions by all authors.

432

## 433 **References**

- 434 1. Hughes TP, Kerry J, Álvarez-Noriega M, Álvarez-Romero J, Anderson K, Baird A, et al. Global  
435 warming and recurrent mass bleaching of corals. *Nature*. 2017;
- 436 2. Hoegh-Guldberg O. Climate change, coral bleaching and the future of the world's coral reefs. *Mar*  
437 *Freshw Res*. 1999;50:839–66.
- 438 3. Patten NL, Harrison PL, Mitchell JG. Prevalence of virus-like particles within a staghorn  
439 scleractinian coral (*Acropora muricata*) from the Great Barrier Reef. *Coral Reefs*. 2008;27(3):569–  
440 80.
- 441 4. Leruste A, Bouvier T, Bettarel Y. Enumerating viruses in coral mucus. *Appl Environ Microbiol*.  
442 2012;78(17):6377–9.
- 443 5. Nguyen-Kim H, Bettarel Y, Bouvier T, Bouvier C, Doan-Nhu H, Nguyen-Ngoc L, et al. Coral  
444 mucus is a hot spot for viral infections. *Appl Environ Microbiol*. 2015;81(17):5773–83.
- 445 6. Vega Thurber R, Payet JP, Thurber AR, Correa AMS. Virus–host interactions and their roles in  
446 coral reef health and disease. *Nat Rev Microbiol* [Internet]. 2017;15:205–16. Available from:  
447 <http://www.nature.com/doi/10.1038/nrmicro.2016.176>
- 448 7. Sweet M, Bythell J. The role of viruses in coral health and disease. *J Invertebr Pathol* [Internet].  
449 2017;147:136–44. Available from: <http://dx.doi.org/10.1016/j.jip.2016.12.005>
- 450 8. Wilson WH, Francis I, Ryan K, Davy SK. Temperature induction of viruses in symbiotic  
451 dinoflagellates. *Aquat Microb Ecol*. 2001;25(1):99–102.
- 452 9. Lohr J, Munn CB, Wilson WH. Characterization of a latent virus-like infection of symbiotic  
453 zooxanthellae. *Appl Environ Microbiol*. 2007;73(9):2976–81.
- 454 10. Lawrence SA, Wilson WH, Davy JE, Davy SK. Latent virus-like infections are present in a  
455 diverse range of *Symbiodinium* spp. (Dinophyta). *J Phycol*. 2014;50(6):984–97.
- 456 11. Marhaver KL, Edwards RA, Rohwer F. Viral communities associated with healthy and bleaching  
457 corals. *Environ Microbiol*. 2008;10(9):2277–86.
- 458 12. Messyasz A, Rosales SM, Mueller RS, Sawyer T, Correa AMS, Thurber AR, et al. Coral  
459 Bleaching Phenotypes Associated With Differential Abundances of Nucleocytoplasmic Large  
460 DNA Viruses. *Front Mar Sci*. 2020;7(October):1–15.
- 461 13. Correa AMS, Ainsworth TD, Rosales SM, Thurber AR, Butler CR, Vega Thurber RL. Viral  
462 outbreak in corals associated with an in situ bleaching event: Atypical herpes-like viruses and a  
463 new megavirus infecting *Symbiodinium*. *Front Microbiol*. 2016;7(FEB):1–14.
- 464 14. Bettarel Y, Thuy NT, Huy TQ, Hoang PK, Bouvier T. Observation of virus-like particles in thin  
465 sections of the bleaching scleractinian coral *Acropora cytherea*. *J Mar Biol Assoc United*  
466 *Kingdom*. 2013;93(4):909–12.
- 467 15. Lesser MP, Bythell JC, Gates RD, Johnstone RW, Hoegh-Guldberg O. Are infectious diseases  
468 really killing corals? Alternative interpretations of the experimental and ecological data. *J Exp*  
469 *Mar Bio Ecol*. 2007;346(1–2):36–44.
- 470 16. Soffer N, Brandt ME, Correa AMS, Smith TB, Thurber RV. Potential role of viruses in white  
471 plague coral disease. *ISME J* [Internet]. 2014;8(2):271–83. Available from:

- 472 <http://dx.doi.org/10.1038/ismej.2013.137>
- 473 17. Lawrence SA, Davy JE, Aeby GS, Wilson WH, Davy SK. Quantification of virus-like particles  
474 suggests viral infection in corals affected by Porites tissue loss. *Coral Reefs*. 2014;33:2014.
- 475 18. Lawrence SA, Davy JE, Wilson WH, Hoegh-Guldberg O, Davy SK. Porites white patch  
476 syndrome: associated viruses and disease physiology. *Coral Reefs*. 2015;34(1):249–57.
- 477 19. Pollock FJ, M. Wood-Charlson E, Van Oppen MJH, Bourne DG, Willis BL, Weynberg KD.  
478 Abundance and morphology of virus-like particles associated with the coral *Acropora hyacinthus*  
479 differ between healthy and white syndrome-infected states. *Mar Ecol Prog Ser*.  
480 2014;510(June):39–43.
- 481 20. Vega Thurber RL, Correa AMS. Viruses of reef-building scleractinian corals. *J Exp Mar Bio Ecol*  
482 [Internet]. 2011;408(1–2):102–13. Available from: <http://dx.doi.org/10.1016/j.jembe.2011.07.030>
- 483 21. Weynberg KD, Voolstra CR, Neave MJ, Buerger P, Van Oppen MJH. From cholera to corals:  
484 Viruses as drivers of virulence in a major coral bacterial pathogen. *Sci Rep*. 2015;5:1–9.
- 485 22. Quistad SD, Grasis JA, Barr JJ, Rohwer FL. Viruses and the origin of microbiome selection and  
486 immunity. *ISME J* [Internet]. 2017;11(4):835–40. Available from:  
487 <http://www.nature.com/doi/10.1038/ismej.2016.182>
- 488 23. Oppen MJH Van, Leong J, Gates RD. Coral-virus interactions: A double-edged sword? *SYMBIOSIS*. 2009;47:1–8.
- 490 24. Correa AMS, Welsh RM, Vega Thurber RL. Unique nucleocytoplasmic dsDNA and +ssRNA  
491 viruses are associated with the dinoflagellate endosymbionts of corals. *ISME J* [Internet].  
492 2013;7(1):13–27. Available from: <http://dx.doi.org/10.1038/ismej.2012.75>
- 493 25. Lawrence SA, Fløge SA, Davy JE, Davy SK, Wilson WH. Exploratory analysis of Symbiodinium  
494 transcriptomes reveals potential latent infection by large dsDNA viruses. *Environ Microbiol*.  
495 2017;19(10):3909–19.
- 496 26. Levin RA, Voolstra CR, Weynberg KD, Van Oppen M. Evidence for a role of viruses in the  
497 thermal sensitivity of coral photosymbionts. *ISME J*. 2017;11:808–12.
- 498 27. Knowles B, Bonachela JA, Behrenfeld MJ, Bondoc KG, Cael BB, Carlson CA, et al. Temperate  
499 infection in a virus–host system previously known for virulent dynamics. *Nat Commun* [Internet].  
500 2020;11(1):1–13. Available from: <http://dx.doi.org/10.1038/s41467-020-18078-4>
- 501 28. Montalvo-Proañó J, Buerger P, Weynberg KD, Van Oppen MJH. A PCR-Based Assay Targeting  
502 the Major Capsid Protein Gene of a Dinornis-Like ssRNA Virus That Infects Coral  
503 Photosymbionts. *Front Microbiol*. 2017;8(September):1–8.
- 504 29. Tomaru Y, Katanozaka N, Nishida K, Shirai Y, Tarutani K, Yamaguchi M, et al. Isolation and  
505 characterization of two distinct types of HcrNAV, a single-stranded RNA virus infecting the  
506 bivalve-killing microalga *Heterocapsa circularisquama*. *Aquat Microb Ecol*. 2004;34(3):207–18.
- 507 30. Shi M, Lin XD, Tian J-H, Chen L-J, Chen X, Li C, et al. Redefining the invertebrate RNA  
508 virosphere. *Nature* [Internet]. 2016;540(7634):539–43. Available from:  
509 <http://dx.doi.org/10.1038/nature20167>
- 510 31. Domingo E, Sheldon J, Perales C. Viral Quasispecies Evolution. *Microbiol Mol Biol Rev*.  
511 2012;76(2):159–216.
- 512 32. Sanjuán R, Domingo-Calap P. Mechanisms of viral mutation. *Cell Mol Life Sci*.

- 513 2016;73(23):4433–48.
- 514 33. Vlok M, Lang AS, Suttle CA. Marine RNA Virus Quasispecies Are Distributed throughout the  
515 Oceans. *mSphere*. 2019;4(2):1–18.
- 516 34. Domingo E, Martinez-salas E, Sobrino F, de la Torre JC, Portela A, Ortin J, et al. The quasispecies  
517 (extremely heterogeneous) nature of viral RNA genome populations: biological relevance—a  
518 review. *Gene*. 1985;40:1–8.
- 519 35. Vignuzzi M, Stone JK, Arnold JJ, Cameron CE, Andino R. Quasispecies diversity determines  
520 pathogenesis through cooperative interactions in a viral population. *Nature*. 2006;439(7074):344–  
521 8.
- 522 36. Holland J, Spindler K, Horodyski F, Grabau E, Nichol S, Vandepol S. Rapid Evolution of RNA  
523 Genomes. *Science* (80- ). 1982;215(4540):1577–85.
- 524 37. Gélín P, Postaire B, Fauvelot C, Magalon H. Molecular Phylogenetics and Evolution Reevaluating  
525 species number, distribution and endemism of the coral genus *Pocillopora* Lamarck, 1816 using  
526 species delimitation methods and microsatellites. *Mol Phylogenet Evol*. 2017;109:430–46.
- 527 38. Pratchett MS, McCowan D, Maynard JA, Heron SF. Changes in Bleaching Susceptibility among  
528 Corals Subject to Ocean Warming and Recurrent Bleaching in Moorea, French Polynesia. *PLoS*  
529 *One*. 2013;8(7):1–10.
- 530 39. Donovan MK, Adam TC, Shantz AA, Speare KE, Munsterman KS, Rice MM, et al. Nitrogen  
531 pollution interacts with heat stress to increase coral bleaching across the seascape. *Proc Natl Acad*  
532 *Sci U S A*. 2020;117(10):5351–7.
- 533 40. Siebeck UE, Marshall NJ, Kluter A, Hoegh-Guldberg O. Monitoring coral bleaching using a  
534 colour reference card. *Coral Reefs*. 2006;
- 535 41. Winters G, Holzman R, Blekhman A, Beer S, Loya Y. Photographic assessment of coral  
536 chlorophyll contents: Implications for ecophysiological studies and coral monitoring. *J Exp Mar*  
537 *Bio Ecol* [Internet]. 2009;380:25–35. Available from:  
538 <http://dx.doi.org/10.1016/j.jembe.2009.09.004>
- 539 42. Hume BCC, Ziegler M, Poulain J, Pochon X, Romac S, Boissin E, et al. An improved primer set  
540 and amplification protocol with increased specificity and sensitivity targeting the Symbiodinium  
541 ITS2 region. *PeerJ*. 2018;2018(5):1–22.
- 542 43. Howe-kerr LI, Bachelot B, Wright RM, Kenkel CD, Bay LK, Correa AMS. Symbiont community  
543 diversity is more variable in corals that respond poorly to stress. *Glob Chang Biol*. 2020;00:1–15.
- 544 44. Hume BCC, Smith EG, Ziegler M, Warrington HJM, Burt JA, LaJeunesse TC, et al. SymPortal: A  
545 novel analytical framework and platform for coral algal symbiont next-generation sequencing  
546 ITS2 profiling. *Mol Ecol Resour*. 2019;19(4):1063–80.
- 547 45. Veglia AJ, E. Rivera Vicéns R, Grupstra CG, Howe-Kerr LI, Correa AM. vAMPIRUS: An  
548 automated, comprehensive virus amplicon sequencing analysis program [Internet]. 2021.  
549 Available from: <https://zenodo.org/record/4549851>
- 550 46. Edgar RC. UNOISE2: improved error-correction for Illumina 16S and ITS amplicon sequencing.  
551 *bioRxiv* [Internet]. 2016;81257. Available from: <http://biorxiv.org/lookup/doi/10.1101/081257>
- 552 47. Rognes T, Flouri T, Nichols B, Quince C, Mahé F. VSEARCH: A versatile open source tool for  
553 metagenomics. *PeerJ*. 2016;2016(10):1–22.



- 554 48. Edgar RC. MUSCLE: A multiple sequence alignment method with reduced time and space  
555 complexity. *BMC Bioinformatics*. 2004;5:1–19.
- 556 49. Darriba D, Posada D, Kozlov AM, Stamatakis A, Morel B, Flouri T. ModelTest-NG: A New and  
557 Scalable Tool for the Selection of DNA and Protein Evolutionary Models. *Mol Biol Evol*.  
558 2020;37(1):291–4.
- 559 50. Oksanen J, Blanchet G, Friendly M, Kindt R, Legendre P, McGlenn D, et al. *vegan: Community  
560 Ecology Package*. R package version 2.4-6. R Packag version 25-6. 2019;
- 561 51. Bates DM, Maechler M, Bolker B, Walker S. *lme4: Mixed-effects modeling with R*. R Packag  
562 version 11-7, <http://CRANR-project.org/package=lme4>. 2014;
- 563 52. Anderson MJ, Walsh DCI. PERMANOVA, ANOSIM, and the Mantel test in the face of  
564 heterogeneous dispersions: What null hypothesis are you testing? *Ecol Monogr*. 2013;83(4):557–  
565 74.
- 566 53. Love MI, Huber W, Anders S. Moderated estimation of fold change and dispersion for RNA-seq  
567 data with DESeq2. *Genome Biol*. 2014;15(12):550.
- 568 54. Rådecker N, Pogoreutz C, Gegner HM, Cárdenas A, Roth F. Heat stress destabilizes symbiotic  
569 nutrient cycling in corals. *Proceeding Natl Acad Sci United Stated Am*.  
570 2021;118(5):e2022653118.
- 571 55. Wham DC, LaJeunesse TC. Symbiodinium population genetics: testing for species boundaries and  
572 analysing samples with mixed genotypes. *Mol Ecol*. 2016;25:2699–712.
- 573 56. Biebricher CK, Eigen M. What Is a Quasispecies? In: Domingo E, editor. *Quasispecies: Concept  
574 and Implications for Virology* [Internet]. Berlin, Heidelberg: Springer Berlin Heidelberg; 2006. p.  
575 1–31. Available from: [https://doi.org/10.1007/3-540-26397-7\\_1](https://doi.org/10.1007/3-540-26397-7_1)
- 576 57. Gelbart M, Harari S, Ben-ari Y, Kustin T, Wolf D, Mandelboim M, et al. Drivers of within-host  
577 genetic diversity in acute infections of viruses. *PLoS Pathog* [Internet]. 2020;16(11):e1009029.  
578 Available from: <http://dx.doi.org/10.1371/journal.ppat.1009029>
- 579 58. Correa AMS, Howard-Varona C, Coy SR, Buchan A, Sullivan MB, Weitz JS. The virus-microbe  
580 infection continuum: Revisiting the viral rules of life. *Nat Rev Microbiol*. 2021;1–35.
- 581 59. Breitbart M, Bonnain C, Malki K, Sawaya NA. Phage puppet masters of the marine microbial  
582 realm. *Nat Microbiol* [Internet]. 2018;3(July). Available from: [http://dx.doi.org/10.1038/s41564-  
583 018-0166-y](http://dx.doi.org/10.1038/s41564-018-0166-y)
- 584 60. Mann NH, Cook A, Millard A, Bailey S, Clokie M. Bacterial photosynthesis genes in a virus.  
585 *Nature*. 2003;424(6950):741.
- 586 61. Marquez LM, Redman RS, Rodriguez RJ, Roossinck MJ. A Virus in a Fungus in a Plant: Three-  
587 way Symbiosis required for thermal tolerance. *Science* (80- ). 2007;315(January).
- 588 62. Holmes EC. The RNA Virus Quasispecies: Fact or Fiction? *J Mol Biol* [Internet].  
589 2010;400(3):271–3. Available from: <http://dx.doi.org/10.1016/j.jmb.2010.05.032>
- 590 63. Pybus OG, Rambaut A, Belshaw R, Freckleton RP, Drummond AJ, Holmes EC. Phylogenetic  
591 evidence for deleterious mutation load in RNA viruses and its contribution to viral evolution. *Mol  
592 Biol Evol*. 2007;24(3):845–52.
- 593 64. Holmes EC. Patterns of Intra- and Interhost Nonsynonymous Variation Reveal Strong Purifying  
594 Selection in Dengue Virus. *J Virol*. 2003;77(20):11296–8.



- 595 65. Edwards CTT, Holmes EC, Pybus OG, Wilson DJ, Viscidi RP, Abrams EJ, et al. Evolution of the  
596 human immunodeficiency virus envelope gene is dominated by purifying selection. *Genetics*.  
597 2006;174(3):1441–53.
- 598 66. Roux S, Hawley AK, Beltran MT, Scofield M, Schwientek P, Stepanauskas R, et al. Ecology and  
599 evolution of viruses infecting uncultivated SUP05 bacteria as revealed by single-cell- and meta-  
600 genomics. *Elife*. 2014;3:e03125.
- 601 67. Labonté JM, Swan BK, Poulos B, Luo H, Koren S, Hallam SJ, et al. Single-cell genomics-based  
602 analysis of virus–host interactions in marine surface bacterioplankton. *ISME J*. 2015;9:2386–99.
- 603 68. Munson-mcgee JH, Peng S, Dewerff S, Stepanauskas R, Whitaker RJ, Weitz JS, et al. A virus or  
604 more in (nearly) every cell: ubiquitous networks of virus–host interactions in extreme  
605 environments. *ISME J* [Internet]. 2018;12:1706–14. Available from:  
606 <http://dx.doi.org/10.1038/s41396-018-0071-7>
- 607 69. Díaz-Muñoz SL. Viral coinfection is shaped by host ecology and virus-virus interactions across  
608 diverse microbial taxa and environments. *Virus Evol*. 2017;3(1):1–14.
- 609 70. Ripp S, Miller R V. The role of pseudolysogeny in bacteriophage-host interactions in a natural  
610 freshwater environment. *Microbiology*. 1997;143(6):2065–70.
- 611 71. Onodera S, Olkkonen VM, Gottlieb P, Strassman J, Qiao XY, Bamford DH, et al. Construction of  
612 a transducing virus from double-stranded RNA bacteriophage phi6: establishment of carrier states  
613 in host cells. *J Virol*. 1992;66(1):190–6.
- 614 72. Wang L, Wu S, Liu T, Sun J, Chi S, Liu C, et al. Endogenous viral elements in algal genomes.  
615 *Acta Oceanol Sin*. 2014;33(2):102–7.
- 616 73. Moniruzzaman M, Weinheimer AR, Martinez-Gutierrez CA, Aylward FO. Widespread  
617 endogenization of giant viruses shapes genomes of green algae. *Nature* [Internet].  
618 2020;588(7836):141–5. Available from: <http://dx.doi.org/10.1038/s41586-020-2924-2>
- 619 74. Ku C, Sheyn U, Sebé-Pedrós A, Ben-Dor S, Schatz D, Tanay A, et al. A single-cell view on alga-  
620 virus interactions reveals sequential transcriptional programs and infection states. *Sci Adv*.  
621 2020;6(21).
- 622 75. Deng L, Ignacio-espinoza JC, Gregory AC, Poulos BT, Weitz JS, Hugenholtz P, et al. Viral  
623 tagging reveals discrete populations in *Synechococcus* viral genome sequence space. *Nature*  
624 [Internet]. 2014;513:242–6. Available from: <http://dx.doi.org/10.1038/nature13459>
- 625 76. Jonge PA De, Costa AR, Franklin L, Brouns SJJ, Jonge PA De, Meijenfildt FAB Von, et al.  
626 Adsorption Sequencing as a Rapid Method to Link Environmental Bacteriophages to Hosts.  
627 *ISCIENCE* [Internet]. 2020;23(9):101439. Available from:  
628 <https://doi.org/10.1016/j.isci.2020.101439>
- 629 77. Jiang SC, Paul JH. Seasonal and diel abundance of viruses and occurrence of  
630 lysogeny/bacteriocinogeny in the marine environment. *Mar Ecol Prog Ser*. 1994;104(1–2):163–72.
- 631 78. Brum JR, Hurwitz BL, Schofield O, Ducklow HW, Sullivan MB. Seasonal time bombs: dominant  
632 temperate viruses affect Southern Ocean microbial dynamics. *ISME J* [Internet]. 2016;10(2):437–  
633 49. Available from: <http://dx.doi.org/10.1038/ismej.2015.125>
- 634 79. Winter C, Bouvier T, Weinbauer MG, Thingstad TF. Trade-Offs between Competition and  
635 Defense Specialists among Unicellular Planktonic Organisms: the “Killing the Winner”  
636 Hypothesis Revisited. *Microbiol Mol Biol Rev*. 2010;74(1):42–57.

- 637 80. Thingstad TF, Våge S, Storesund JE, Sandaa R, Giske J. A theoretical analysis of how strain-  
638 specific viruses can control microbial species diversity. *PNAS*. 2014;111(21).
- 639 81. Thingstad TF. Elements of a theory for the mechanisms controlling abundance, diversity, and  
640 biogeochemical role of lytic bacterial viruses in aquatic systems. *Limnol Oceanogr*.  
641 2000;45(6):1320–8.
- 642 82. Edgar RS, Lielausis I. Temperature-sensitive mutants of bacteriophage T4D: Their isolation and  
643 genetic characterization. *Genetics*. 1964;49(April):649–62.
- 644 83. Vega Thurber RL, Barott KL, Hall D, Liu H, Rodriguez-Mueller B, Desnues C, et al.  
645 Metagenomic analysis indicates that stressors induce production of herpes-like viruses in the coral  
646 *Porites compressa*. *Proc Natl Acad Sci U S A*. 2008;105(47):18413–8.
- 647 84. Sadeghi M, Tomaru Y, Ahola T. RNA Viruses in Aquatic Unicellular Eukaryotes. *Viruses*. 2021;
- 648 85. Tomaru Y, Hata N, Masuda T, Tsuji M, Igata K, Masuda Y, et al. Ecological dynamics of the  
649 bivalve-killing dinoflagellate *Heterocapsa circularisquama* and its infectious viruses in different  
650 locations of western Japan. *Environ Microbiol*. 2007;9(6):1376–83.
- 651 86. Randall RE, Griffin DE. Within host RNA virus persistence: mechanisms and consequences. *Curr*  
652 *Opin Virol* [Internet]. 2017;23(August):35–42. Available from:  
653 <http://dx.doi.org/10.1016/j.coviro.2017.03.001>
- 654 87. Roossinck MJ. Lifestyles of plant viruses. *Philos Trans R Soc B Biol Sci*. 2010;365(1548):1899–  
655 905.
- 656 88. Honjo MN, Emura N, Kawagoe T, Sugisaka J, Kamitani M, Nagano AJ, et al. Seasonality of  
657 interactions between a plant virus and its host during persistent infection in a natural environment.  
658 *ISME J* [Internet]. 2020;14(2):506–18. Available from: [http://dx.doi.org/10.1038/s41396-019-](http://dx.doi.org/10.1038/s41396-019-0519-4)  
659 [0519-4](http://dx.doi.org/10.1038/s41396-019-0519-4)
- 660 89. Kim Y, Kim YJ, Paek K-H. Temperature-specific vsiRNA confers RNAi-mediated viral  
661 resistance at elevated temperature in *Capsicum annum*. *J Exp Bot*. 2020;72(4):1432–48.
- 662 90. Jones RAC. Future Scenarios for Plant Virus Pathogens as Climate Change Progresses [Internet].  
663 1st ed. Vol. 95, *Advances in Virus Research*. Elsevier Inc.; 2016. 87–147 p. Available from:  
664 <http://dx.doi.org/10.1016/bs.aivir.2016.02.004>
- 665 91. Brüwer JD, Agrawal S, Liew YJ, Aranda M, Voolstra CR. Association of coral algal symbionts  
666 with a diverse viral community responsive to heat shock. *BMC Microbiol*. 2017;17(1):1–11.
- 667 92. Cevallos RC, Sarnow P. Temperature Protects Insect Cells from Infection by Cricket Paralysis  
668 Virus. *J Virol*. 2010;84(3):1652–5.
- 669 93. Lohr J, Munn CB, Wilson WH. Characterization of a latent virus-like infection of symbiotic  
670 zooxanthellae. *Appl Environ Microbiol*. 2007;73(9):2976–81.
- 671 94. Weynberg KD, Levin RA, Neave MJ, Clode PL, Voolstra CR, Brownlee C, et al. Prevalent viral  
672 infection in cultures of the coral algal endosymbiont,. *Coral Reefs*. 2017;
- 673 95. Seifert M, van Nies P, Papini FS, Arnold JJ, Poranen MM, Cameron CE, et al. Temperature  
674 controlled high-throughput magnetic tweezers show striking difference in activation energies of  
675 replicating viral RNA-dependent RNA polymerases. *Nucleic Acids Res*. 2020;48(10):5591–602.
- 676 96. Wooldridge SA. Differential thermal bleaching susceptibilities amongst coral taxa: Re-posing the  
677 role of the host. *Coral Reefs*. 2014;33(1):15–27.

678 97. Guest JR, Baird AH, Maynard JA, Muttaqin E, Edwards AJ, Campbell SJ, et al. Contrasting  
679 patterns of coral bleaching susceptibility in 2010 suggest an adaptive response to thermal stress.  
680 PLoS One. 2012;7(3):e33353.

681

682

683 **Figure legends**

684 **Figure 1** Representative examples of Symbiodiniaceae cells in *Pocillopora* species  
685 complex coral fragments in control (a-b) and heat (c-f) treatments after 24 hours, as well as  
686 examples of virus-like particles (VLPs) associated with these Symbiodiniaceae cells. Some  
687 Symbiodiniaceae cells in heat-treated coral fragments exhibited vacuolization, unlike cells in  
688 control fragments (a-b). Many vacuoles contained VLPs (c-f). Most observed VLPs had  
689 icosahedral, electron-dense capsids that ranged from 110-170 nm in diameter and lacked an  
690 envelope. Many VLPs appeared to be endocytosed by—or exiting—Symbiodiniaceae cells (d-f),  
691 and some VLPs were visible outside Symbiodiniaceae cells (c). (d) is an enlargement of (c).  
692 Arrows indicate VLPs. C: Symbiodiniaceae cell chloroplast; N: Symbiodiniaceae cell nucleus; P:  
693 *Pocillopora* species complex coral tissue; S: Symbiodiniaceae cell starch grain; V: Vacuole.

694

695 **Figure 2** Maximum likelihood tree of major capsid protein (*mcp*) aminotypes (unique  
696 amino acid sequences) from Symbiodiniaceae-infecting dinoRNA viruses ('dinoRNAVs')  
697 isolated from five coral colonies of *Pocillopora* species complex. Aminotypes recovered in this  
698 study were similar to those reported in a previous work that isolated dinoRNAV sequences from  
699 6 coral species via similar methods (28). Black dots at nodes represent bootstrap support >75%.  
700 Colors adjacent to the tree indicate the study (orange, purple) or NCBI reference (blue) for each  
701 *mcp* aminotype. Reference NCBI accession numbers are: Beihai Sobemo-like Virus 4  
702 (YP\_009336877), Sponge Weivirus-like Virus 6 (ASM94037), Cladocopium Virus i2  
703 (AOS87317), Cladocopium Virus i1 (AOG17586), HcRNAV-CY (BAE47072), HcRNAV-UA  
704 (BAE47070) and HcRNAV-659 (BAU51723). Rings with black or red squares indicate the  
705 relative, log(10)-transformed abundances of dinoRNAV aminotype in fragments from individual  
706 coral colonies in the control or heat treatment, respectively. Aminotypes labeled with *PVID* and a  
707 numeral comprise >1% abundance of the total dataset and are included in Figure 3. Black and  
708 red asterisks indicate aminotypes that were significantly associated with control or heat  
709 treatments, respectively (see Figure 5 for details).

710

711 **Figure 3** Overview of Symbiodiniaceae-infecting dinoRNAV major capsid protein (*mcp*)  
712 gene aminotypes (unique amino acid sequences) associated with five colonies of the stony coral  
713 *Pocillopora* species complex. (a) Venn diagram indicating that ~82% (102) of 124 unique  
714 aminotypes were shared between coral colonies. Non-rarified data for each colony ranges from  
715 8-11 fragments sampled from control and heated aquaria. The total number of aminotypes  
716 detected per colony is given in parentheses. (b) The relative abundances of *mcp* aminotypes  
717 differed in fragments exposed to a ~2 °C temperature increase ('Heat' treatment), compared to  
718 fragments from the same colonies exposed to ambient reef conditions ('Control'). Empty bars  
719 correspond to samples that had <10 000 reads and were excluded from the analysis.  
720 PERMANOVA results: Coral colony  $R^2 = 0.762$ ,  $p < 0.001$ ; Treatment  $R^2 = 0.024$ ,  $p < 0.001$ ;  
721 Treatment\*Coral colony  $R^2 = 0.068$ ,  $p < 0.001$ ; Time  $R^2 = 0.014$ ,  $p > 0.05$ .

722

723 **Figure 4** Diversity of Symbiodiniaceae-infecting dinoRNAV major capsid protein (*mcp*)  
724 gene aminotypes (unique amino acid sequences) in heat ('Heat', 'H') versus control ('Control',  
725 'C') conditions. (a) Venn diagram of non-rarified aminotypes in heat and control treatments.  
726 Seventeen unique aminotypes were detected in coral fragments exposed to heat, compared to 1  
727 unique aminotype in control fragments. (b, h) Diversity (Shannon's diversity index, H) of  
728 aminotypes increased in fragments exposed to heat compared to control fragments, and over time  
729 (d, h); variation also appeared to occur among colonies (f). (c, i) Estimated aminotype richness  
730 increased in fragments exposed to heat, but not over time (e, i). (g) Mean aminotype richness  
731 also appeared to vary among colonies. Linear mixed effects model (LMM) results for Shannon's  
732 diversity index (h) and estimated richness (i). Shannon's diversity index values were based on  
733 sequencing data rarefied to 59 837 amino acid sequences per sample; richness was estimated by  
734 repeated random subsampling of unrarified data.

735

736 **Figure 5** Differentially abundant Symbiodiniaceae-infecting dinoRNAV major capsid  
737 protein (*mcp*) aminotypes (unique amino acid sequences) across the experiment. Twenty-eight  
738 viral aminotypes (each represented as a point with a unique shape and color) were differentially  
739 abundant across control and heated *Pocillopora* species complex coral fragments. Of these, 22  
740 aminotypes occurred at higher relative abundances in heat-treated fragments (right of the 0 lines)  
741 and 6 had higher relative abundances in control fragments (left of the 0 lines). Ten aminotypes  
742 were differentially abundant at multiple (2-4) timepoints throughout the experiment. This  
743 analysis was conducted using DeSeq2 on a non-rarefied dataset. DESeq2 analyses were run  
744 separately for each time point ( $t_{(h)} = 4, 12, 24, 72, 108$ , see Methods for more details).

745



746 **Figure 6** Dispersion of Symbiodiniaceae-infecting dinoRNAV major capsid protein (*mcp*)  
747 gene aminotypes (unique amino acid sequences) associated with *Pocillopora* species complex  
748 coral fragments in heat-treated (H) versus control (C) conditions. (a) A non-metric  
749 Multidimensional Scaling (nMDS) plot depicts that dinoRNAVs differ by coral colony ID, and  
750 to a lesser extent, treatment. (b) Dispersion of dinoRNAV aminotypes was higher in heat-treated  
751 fragments. (c) Mean ( $\pm$ SE) aminotype dispersion was consistently higher over time in heat-  
752 treated fragments and (d) varied among coral colonies. (e) Results of a linear mixed effects  
753 model testing the effect of treatment and time on dispersion. Centroids were calculated  
754 separately for each colony in control and heat-treated conditions based on Bray-Curtis distances  
755 from square-root-transformed rarefied data. Dispersion was quantified by measuring the distance  
756 of each sample to its centroid.

757

**Table 1** Summary of studies in which Symbiodiniaceae-infecting dinoflagellate RNA virus (dinoRNAV) genes have been recovered from coral colonies or Symbiodiniaceae cultures. Samples sizes are n=1 unless otherwise indicated in parentheses. **Bolded** Symbiodiniaceae types were directly identified in a given study. All other Symbiodiniaceae listed represent the genera typically reported from each coral species based on published literature.

| <i>Sample type</i>              | <i>Symbiodiniaceae genus or species (detected or reported in literature)</i> | <i>Collection location</i>                  | <i>DinoRNAV detection method</i>                                | <i>Notes</i>                                                                                                                                                                                                     | <i>Reference</i>            |
|---------------------------------|------------------------------------------------------------------------------|---------------------------------------------|-----------------------------------------------------------------|------------------------------------------------------------------------------------------------------------------------------------------------------------------------------------------------------------------|-----------------------------|
| <b>Coral holobiont</b>          |                                                                              |                                             |                                                                 |                                                                                                                                                                                                                  |                             |
| <i>Montastrea cavernosa</i> (4) | <i>Cladocopium</i> <sup>a</sup>                                              | Key West, FL                                | Viral particle isolation, 454 pyrosequencing                    | DinoRNAVs detected in heat-treated corals.                                                                                                                                                                       | Correa et al. 2013          |
| <i>Acropora tenuis</i>          | <i>Cladocopium</i> <sup>b</sup>                                              | Orpheus Island, Central GBR                 | Viral particle isolation, RP-SISPA, MiSeq sequencing.           | DinoRNAVs ≥99% of ssRNA viruses detected from pooled tissue of 3 colonies. No dinoRNAVs detected in <i>Pocillopora damicornis</i> .                                                                              | Weynberg et al. 2014        |
| <i>Acropora tenuis</i>          | <i>Cladocopium</i> <sup>b</sup>                                              | Davies Reef and Orpheus Island, Central GBR | Viral particle isolation, targeted PCR assay, MiSeq sequencing. | DinoRNAVs not detected in <i>Acropora hyacinthus</i> , <i>Acropora millepora</i> or <i>Goniastrea aspera</i> .                                                                                                   | Montalvo-Proaño et al. 2017 |
| <i>Fungia fungites</i>          | <i>Cladocopium</i> <sup>b</sup>                                              |                                             |                                                                 |                                                                                                                                                                                                                  |                             |
| <i>Galaxea fascicularis</i>     | <i>Cladocopium</i> or <i>Durusdinium</i> <sup>b</sup>                        |                                             |                                                                 |                                                                                                                                                                                                                  |                             |
| <i>Pocillopora damicornis</i>   | <i>Cladocopium</i> <sup>b</sup>                                              |                                             |                                                                 |                                                                                                                                                                                                                  |                             |
| <i>Porites cylindrica</i>       | <i>Cladocopium</i> <sup>b</sup>                                              |                                             |                                                                 |                                                                                                                                                                                                                  |                             |
| <i>Porites lutea</i> (6)        | <b><i>Cladocopium C15</i></b>                                                |                                             |                                                                 |                                                                                                                                                                                                                  |                             |
| <i>Acropora tenuis</i>          | <i>Cladocopium</i> <sup>b</sup>                                              | Orpheus Island, Central GBR                 | Viral particle isolation, RP-SISPA, MiSeq sequencing.           | Corals collected in triplicate and pooled prior to sequencing. DinoRNAVs not detected in <i>Goniastrea aspera</i> , <i>Pocillopora acuta</i> , <i>Pocillopora damicornis</i> , or <i>Pocillopora verrucosa</i> . | Weynberg et al. 2017        |
| <i>Fungia fungites</i>          | <i>Cladocopium</i> <sup>b</sup>                                              |                                             |                                                                 |                                                                                                                                                                                                                  |                             |
| <i>Galaxea fascicularis</i>     | <i>Cladocopium</i> or <i>Durusdinium</i> <sup>b</sup>                        |                                             |                                                                 |                                                                                                                                                                                                                  |                             |
|                                 |                                                                              |                                             |                                                                 |                                                                                                                                                                                                                  |                             |
| <b>Symbiodiniaceae culture</b>  |                                                                              |                                             |                                                                 |                                                                                                                                                                                                                  |                             |
| <i>Cladocopium</i> C1 (2)       | <b><i>Cladocopium C1</i></b>                                                 | Magnetic Island and South Molle Island,     | HiSeq sequencing of poly(A)-purified RNA.                       | Culture originally isolated from <i>Acropora tenuis</i> . Higher expression of dinoRNAV major capsid protein genes in a thermo-                                                                                  | Levin et al. 2017           |

Central  
GBR

sensitive *Cladocopium*  
strain under ambient  
temperatures.

---

<sup>a</sup> Serrano et al. 2014

<sup>b</sup> Tonk et al. 2013

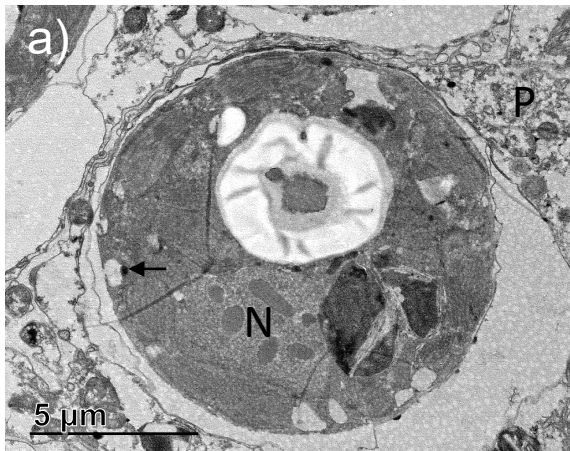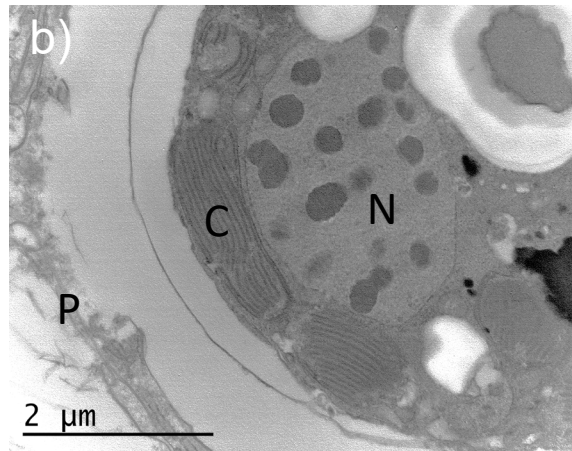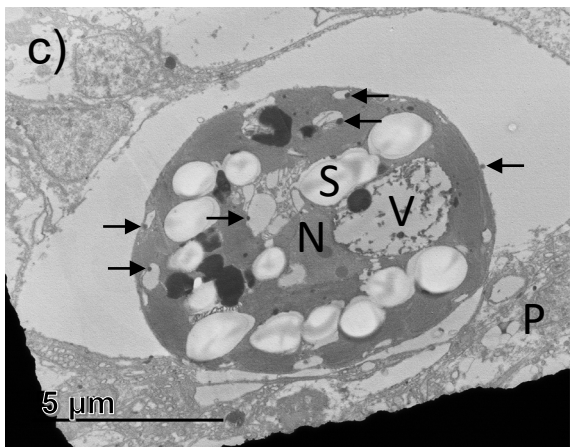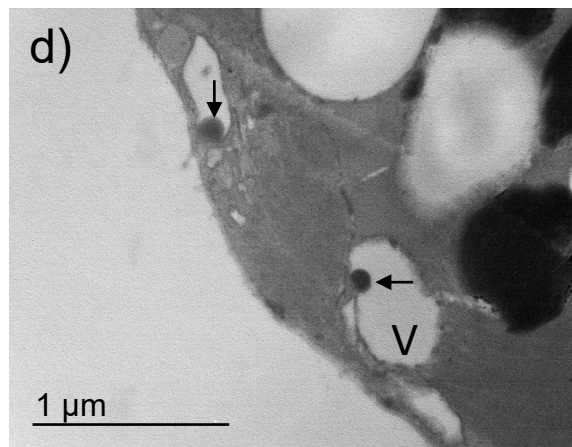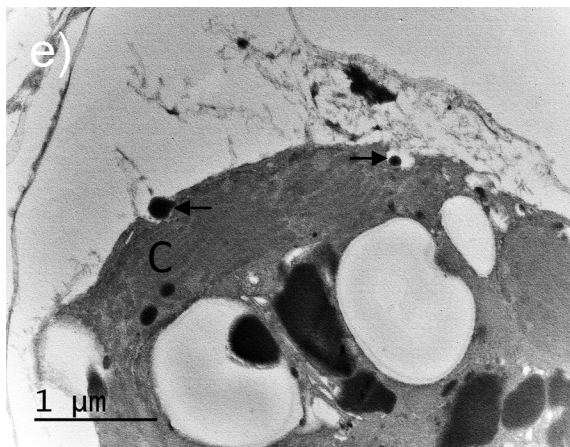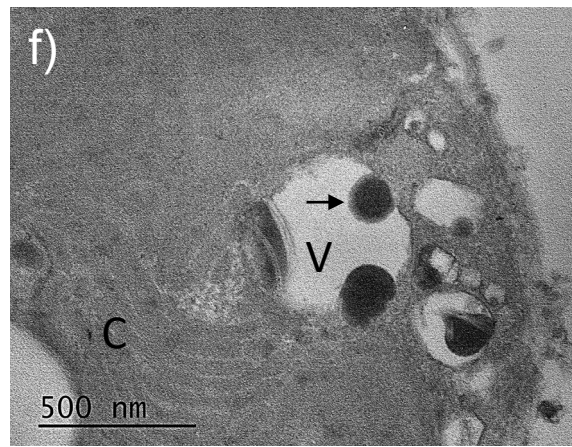

- Pacific *Pocillopora* dinoRNAV *mcp* aminotype (this study)
- Pacific dinoRNAV *mcp* aminotype (Montalvo-Proañó *et al.* 2017)
- Reference dinoRNAV *mcp* aminotype

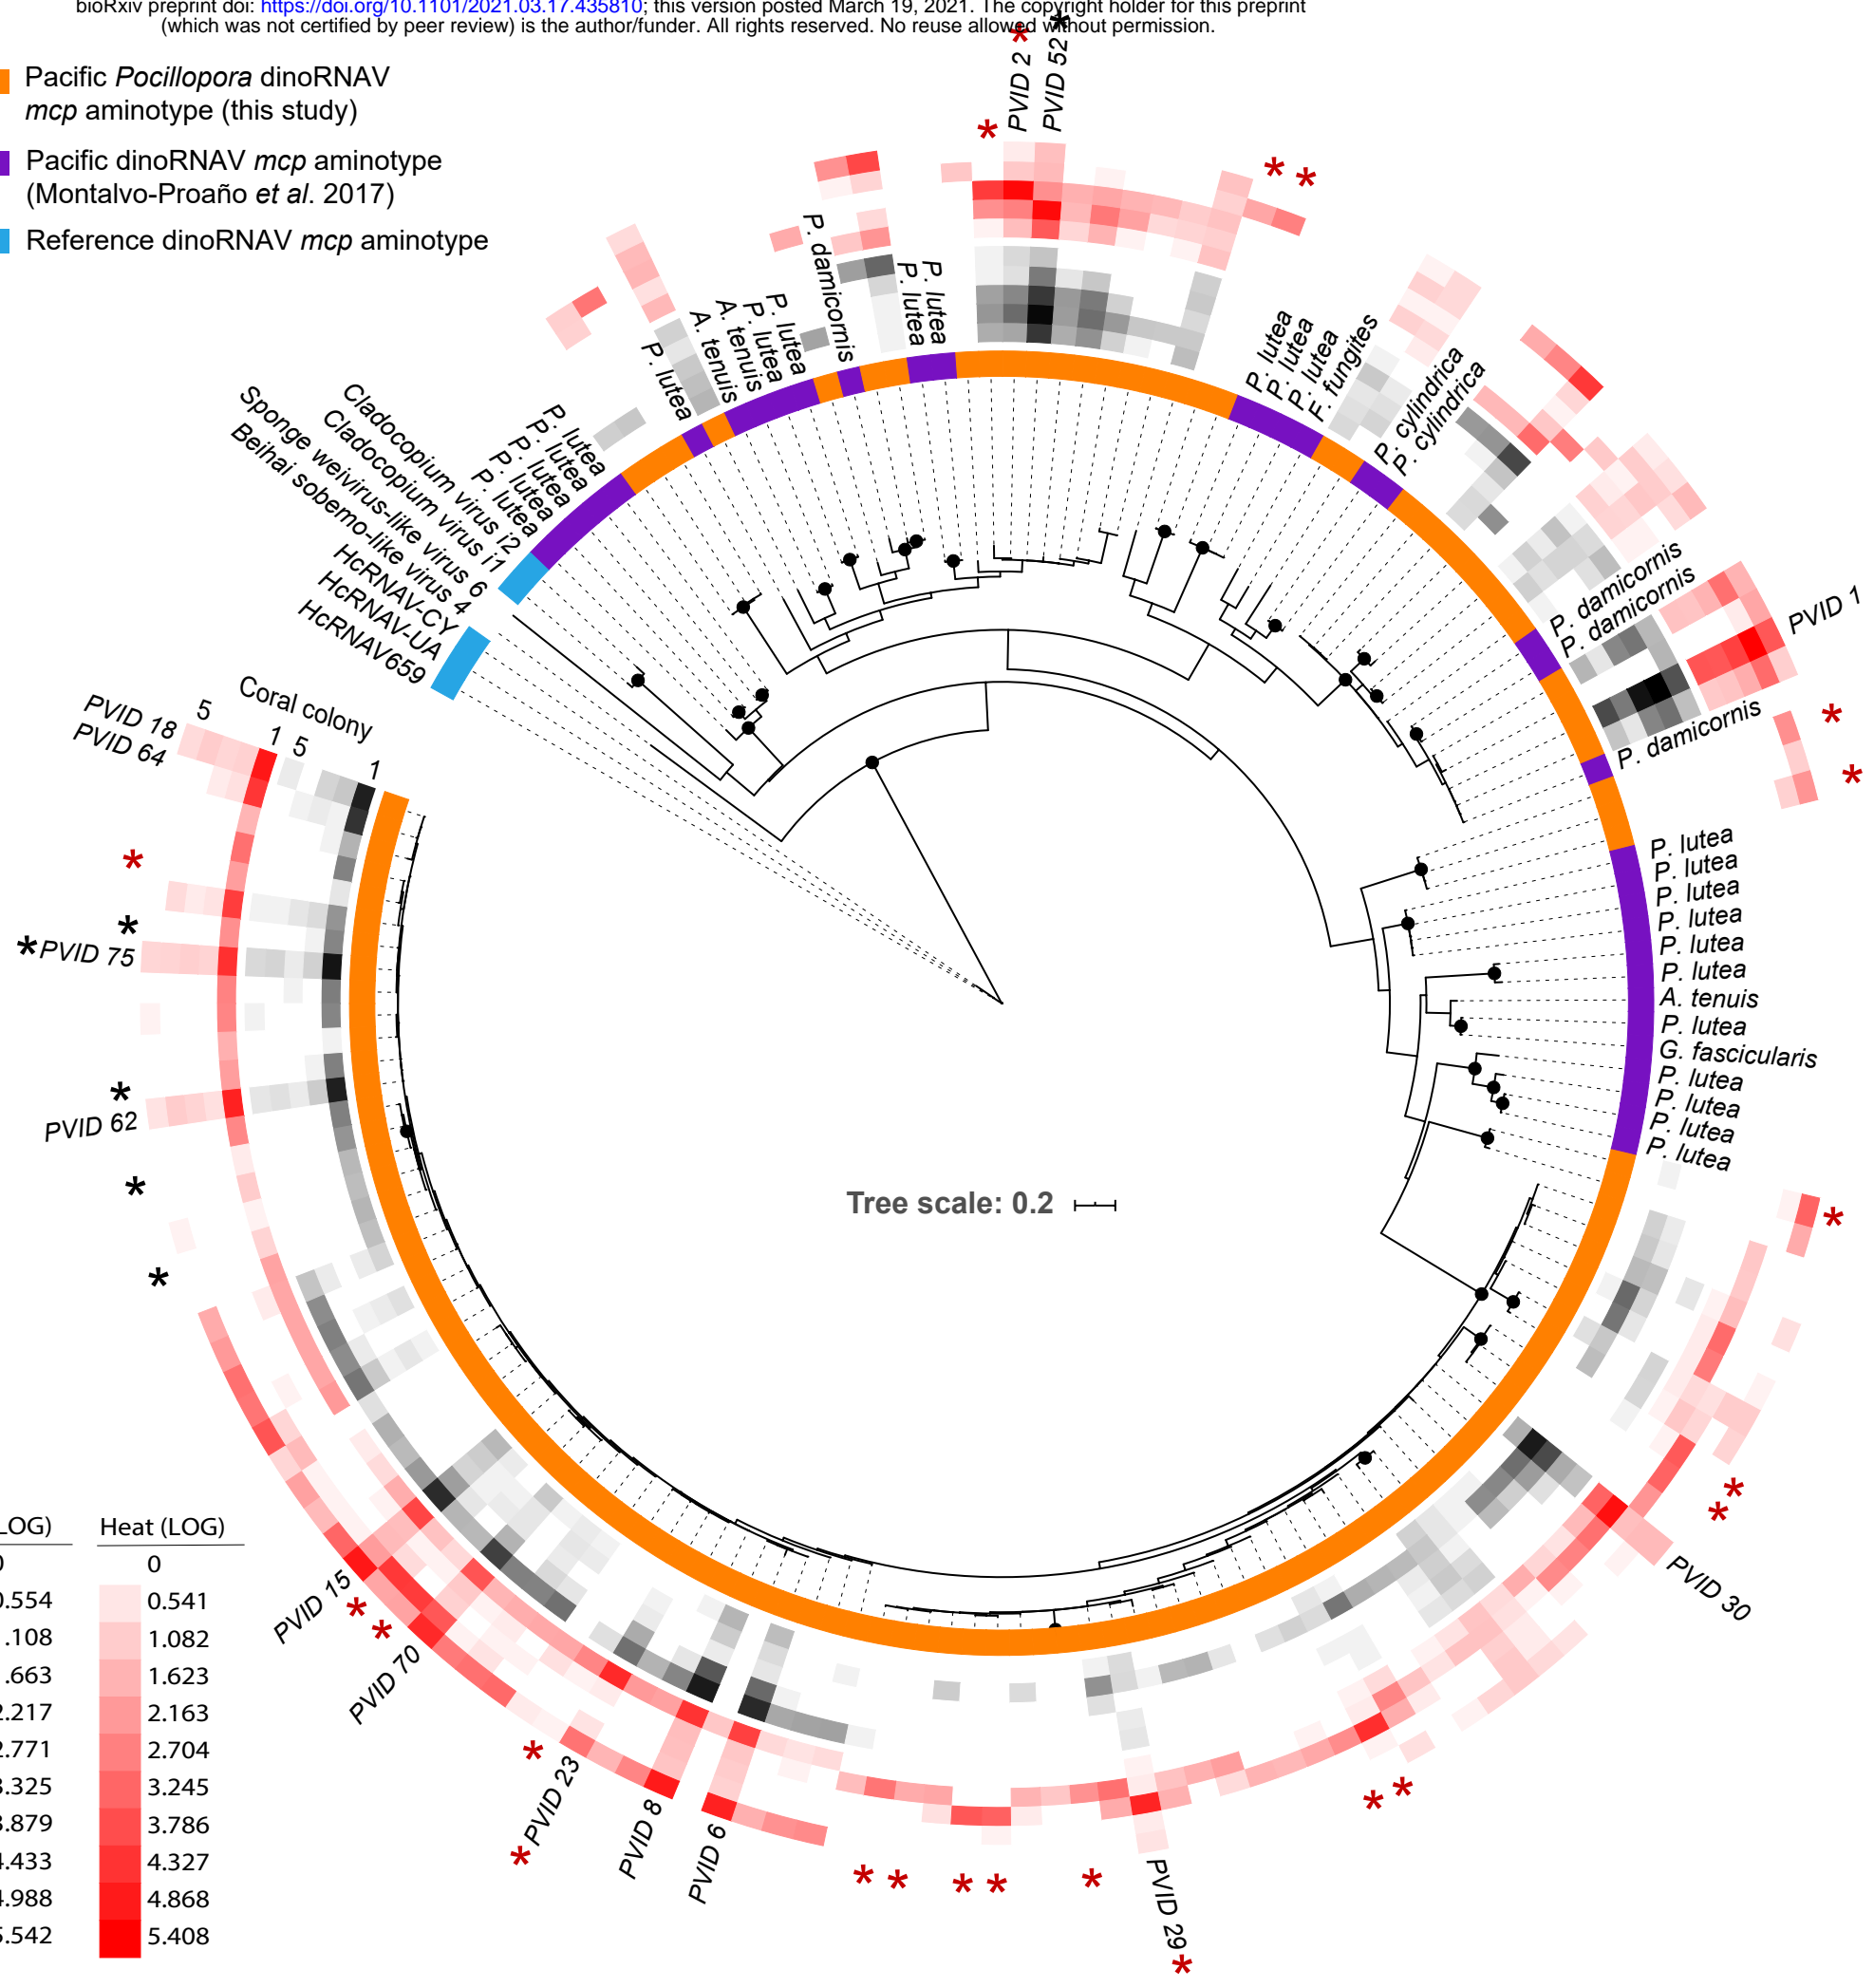

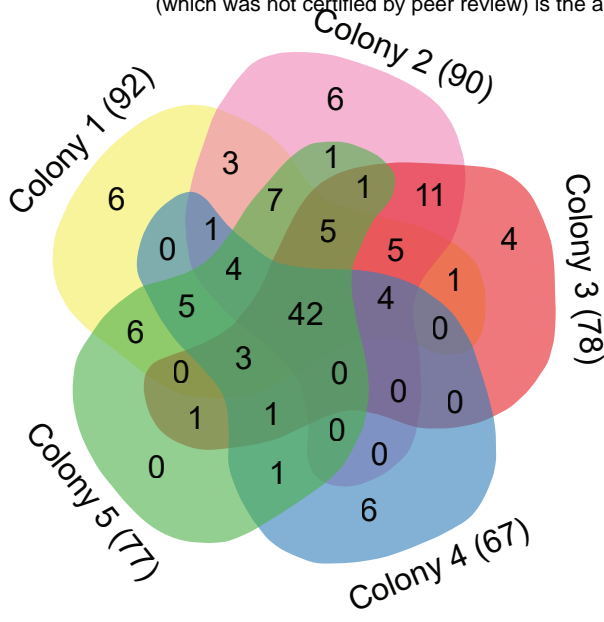

**b** Relative aminotype abundances

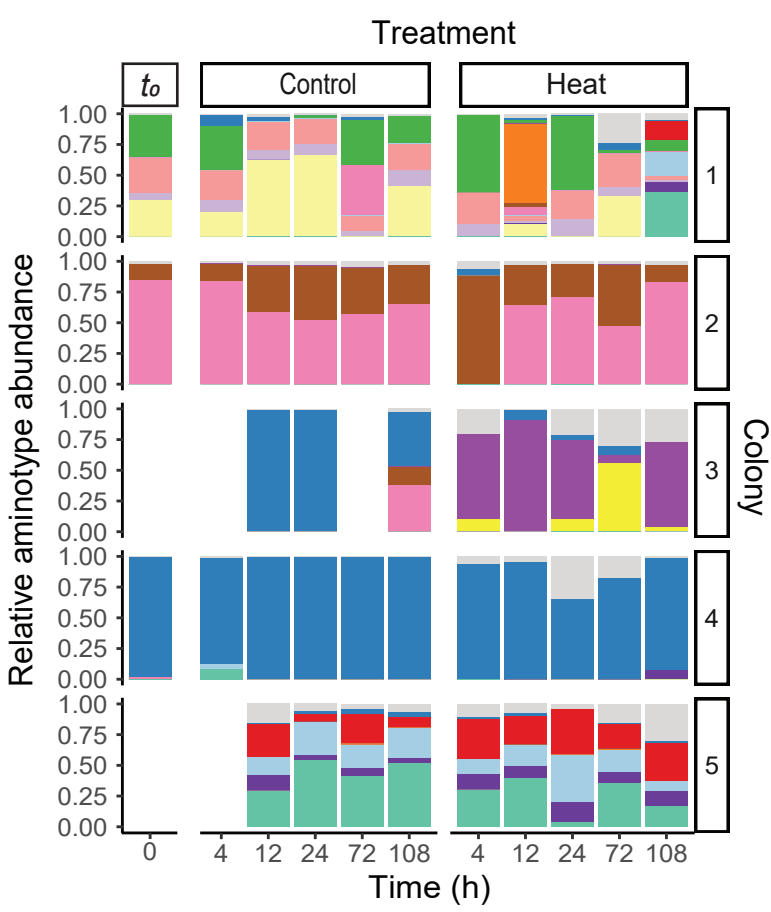

**Aminotypes**

- Other < 1%
- PVID\_AminoType1
- PVID\_AminoType15
- PVID\_AminoType18
- PVID\_AminoType2
- PVID\_AminoType23
- PVID\_AminoType29
- PVID\_AminoType30
- PVID\_AminoType52
- PVID\_AminoType6
- PVID\_AminoType62
- PVID\_AminoType64
- PVID\_AminoType70
- PVID\_AminoType75
- PVID\_AminoType8

# a Overall aminotype richness

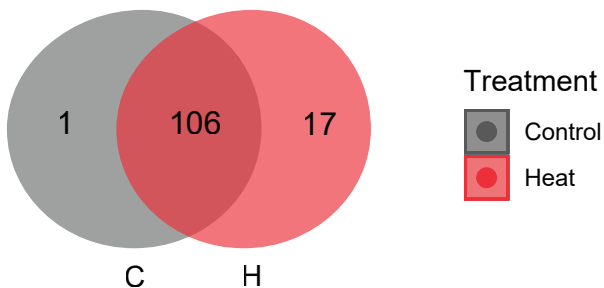

## b Shannon's H

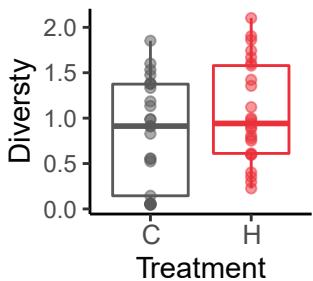

## c Richness

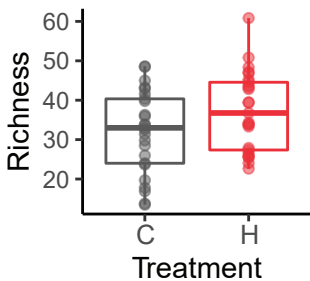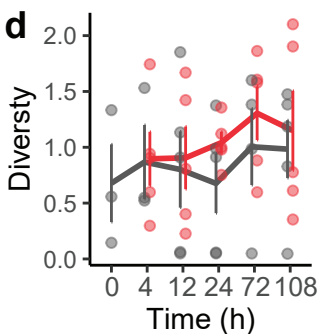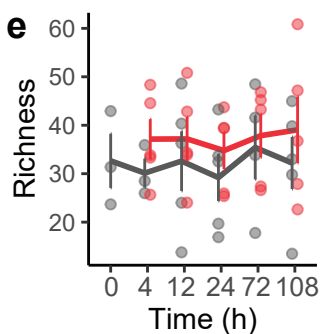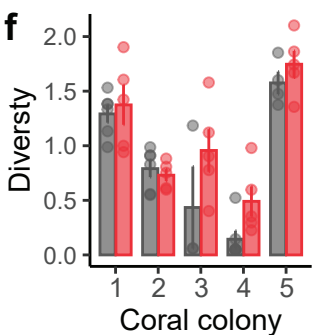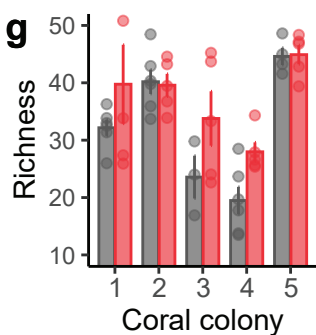

## h

LMM results:

|                |            |
|----------------|------------|
| Treatment      | $p < 0.05$ |
| Time           | $p < 0.05$ |
| Treatment*Time | $p > 0.05$ |

## i

LMM results:

|                |            |
|----------------|------------|
| Treatment      | $p < 0.05$ |
| Time           | $p > 0.05$ |
| Treatment*Time | $p > 0.05$ |

**Table 2** Summary of observations, relative abundance and identity of Symbiodiniaceae-infecting dinoRNAV aminotypes (unique amino acid sequences) specific to heat or control fragments in this study. ‘Colony’ indicates the coral colony IDs in which a given aminotype was detected. ‘N\_Observations’ lists the total number of fragments in which a given aminotype was observed. ‘Time observed (h)’ lists the sampling timepoints at which an aminotype was detected. ‘Mean relative abundance (%)’ indicates the mean relative abundance of an aminotype across the fragments from which it was detected. ‘Closest match’ lists the strongest similarity of an aminotype in this study to known or putative viruses based on BLASTx against a reference database containing all sequences from the reference viral database (Goodacre et al., 2018) and the aminotypes generated from reprocessed Montalvo-Proaño et al. (2017) data.

| <i>Aminotype ID</i>      | <i>Colony</i> | <i>N_Observations</i> | <i>Time observed (h)</i> | <i>Mean relative abundance (%)</i> | <i>Closest match</i>     |
|--------------------------|---------------|-----------------------|--------------------------|------------------------------------|--------------------------|
| <i>Heat treatment</i>    |               |                       |                          |                                    |                          |
| 22                       | 4             | 3                     | 12,24,72                 | 0.048                              | Plutea_AminoType17       |
| 25                       | 3             | 2                     | 24,72                    | 1.766                              | Plutea_AminoType21       |
| 37                       | 2             | 1                     | 4                        | 0.098                              | Plutea_AminoType21       |
| 44                       | 1             | 2                     | 4,12                     | 0.013                              | Plutea_AminoType13       |
| 68                       | 2,3           | 4                     | 4,24,72                  | 0.016                              | Plutea_AminoType21       |
| 72                       | 3             | 1                     | 4                        | 0.021                              | Pdamicornis_AminoType1   |
| 76                       | 1,2,5         | 5                     | 4,12,24,72               | 0.026                              | Plutea_AminoType13       |
| 80                       | 2             | 1                     | 108                      | 0.033                              | Plutea_AminoType21       |
| 81                       | 4             | 1                     | 108                      | 0.027                              | Plutea_AminoType5        |
| 87                       | 4             | 1                     | 24                       | 0.019                              | Plutea_AminoType10       |
| 104                      | 3             | 2                     | 24,72                    | 0.162                              | Plutea_AminoType21       |
| 107                      | 4             | 3                     | 24,72,108                | 0.035                              | Gfascicularis_AminoType1 |
| 112                      | 4             | 4                     | 12,24,72,108             | 0.217                              | Plutea_AminoType17       |
| 114                      | 3             | 1                     | 72                       | 1.380                              | Plutea_AminoType4        |
| 115                      | 2,3           | 2                     | 4,72                     | 0.684                              | Plutea_AminoType21       |
| 117                      | 2             | 1                     | 108                      | 0.375                              | Plutea_AminoType21       |
| 118                      | 4             | 1                     | 4                        | 0.376                              | Plutea_AminoType10       |
| <i>Control treatment</i> |               |                       |                          |                                    |                          |
| 91                       | 2             | 1                     | 72                       | 0.019                              | Plutea_AminoType4        |



Timepoint (h)

Aminotype

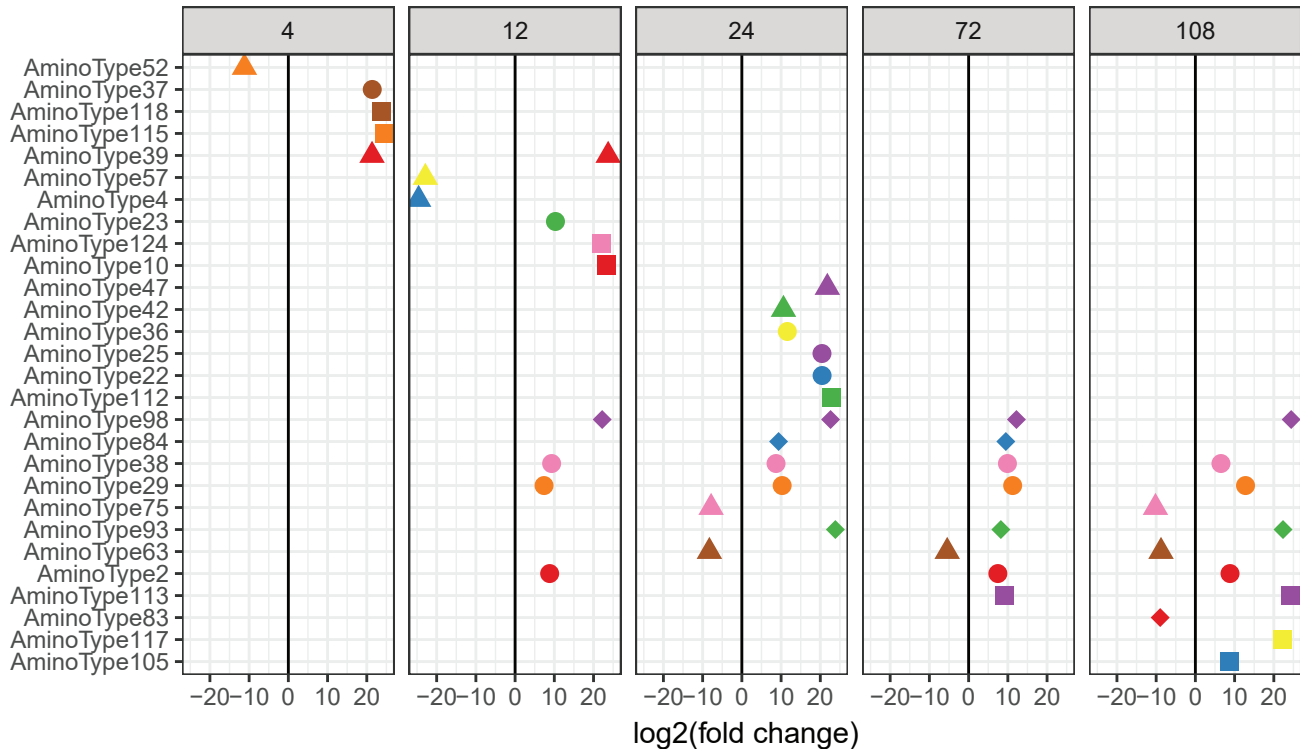

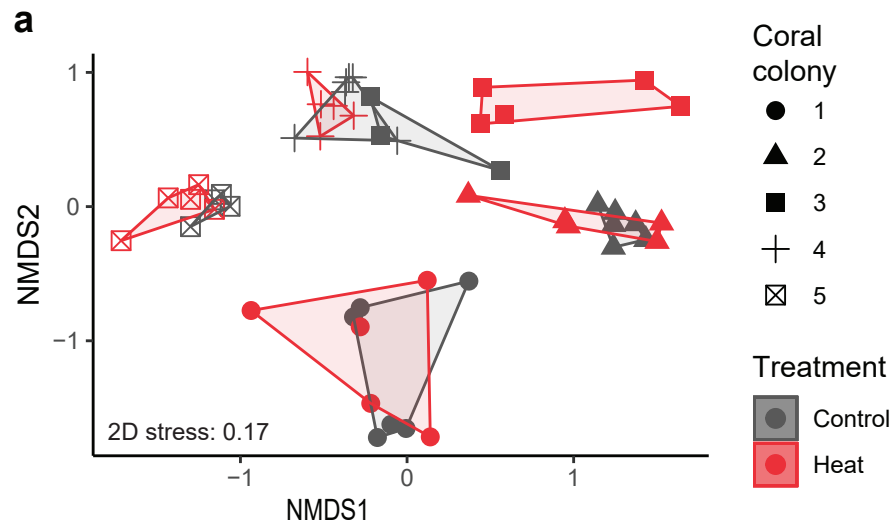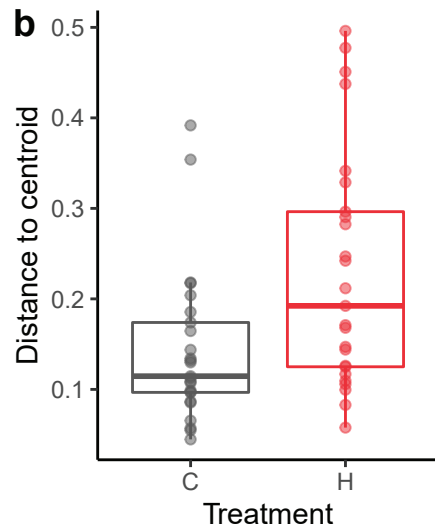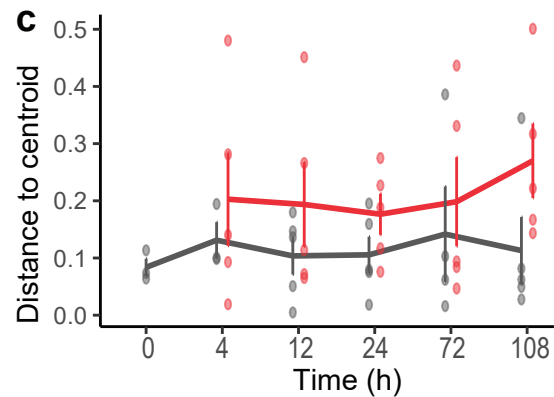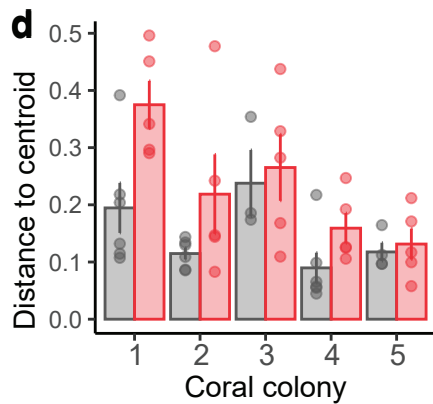

**e**

LMM results:

|                  |                  |
|------------------|------------------|
| <b>Treatment</b> | <b>p&lt;0.05</b> |
| Time             | p>0.05           |
| Treatment*Time   | p>0.05           |
